# Supplementary material for: Late-stage peptide C–H alkylation for bioorthogonal C–H activation featuring solid phase peptide synthesis
Source: PubMed Central journal article supplement (PMC6685959; doi:10.1038/s41467-019-11395-3), 2019-08-07
Supplement: 41467_2019_11395_MOESM2_ESM.pdf [file 41467_2019_11395_MOESM2_ESM.pdf]

## Description of Additional Supplementary Files

File Name: Supplementary Data 1

Description: Cartesian coordinates and energy values for all calculated structures.
