# Supplementary material for: Late-stage peptide C–H alkylation for bioorthogonal C–H activation featuring solid phase peptide synthesis
Source: PubMed Central journal article supplement (PMC6685959; doi:10.1038/s41467-019-11395-3), 2019-08-07
Supplement: 41467_2019_11395_MOESM3_ESM.pdf [file 41467_2019_11395_MOESM3_ESM.pdf]

## Cartesian Coordinates and Energies

(PBE0-D3(BJ)/def2-QZVP\*+SMD(AcOH)/PBE0-D3(BJ)/def2-SVP level of theory)

|                                                 |   |           |           |           |
|-------------------------------------------------|---|-----------|-----------|-----------|
| Intermediate A                                  | N | -0.416716 | 0.576789  | 1.417002  |
| E(SMD/def2-QZVP*) = -1322.919154 E <sub>h</sub> | C | 2.832896  | -0.322632 | 0.471541  |
| $\Delta\Delta G(353) = 0.396571 E_h$            | C | 1.374669  | -1.925694 | 1.126673  |
| Lowest frequency = 22.96 cm <sup>-1</sup>       | C | 3.320410  | -1.576828 | 0.028247  |
| C 0.870786 0.416361 1.779894                    | C | 3.485920  | 0.879667  | 0.185264  |
| C -1.166562 1.483725 2.072342                   | C | 2.380633  | -2.573190 | 0.470666  |
| C -0.652466 2.303816 3.063897                   | C | 4.510303  | -1.618962 | -0.715069 |
| C 0.690470 2.172181 3.412393                    | C | 4.660534  | 0.804706  | -0.554259 |
| C 1.455151 1.207542 2.771347                    | H | 3.099729  | 1.842016  | 0.528456  |
| Ru -1.268052 -0.305841 -0.319330                | H | 2.456111  | -3.649646 | 0.332145  |
| C 0.252213 0.574196 -1.618035                   | C | 5.167767  | -0.430051 | -0.997241 |
| C 0.256352 -0.823239 -1.789690                  | H | 4.909621  | -2.573295 | -1.065189 |
| C -0.953674 -1.524016 -2.093205                 | H | 5.201604  | 1.723062  | -0.791839 |
| C -2.145643 -0.772976 -2.240708                 | H | 6.095552  | -0.449268 | -1.572522 |
| C -2.134585 0.633390 -2.022135                  | N | 1.632639  | -0.557201 | 1.134385  |
| C -0.942022 1.344918 -1.721047                  | O | -3.036059 | -0.315197 | 0.832301  |
| H 1.175088 -1.382934 -1.604470                  | C | -2.748843 | -1.437392 | 1.353166  |
| H -3.087066 1.169690 -2.000182                  | O | -1.685360 | -1.983354 | 0.936323  |
| H 2.498390 1.029841 3.035477                    | C | -3.587823 | -2.046694 | 2.417450  |
| H 1.131398 2.796700 4.192389                    | H | -3.514274 | -3.140658 | 2.382777  |
| H -1.301712 3.033252 3.549681                   | H | -3.212365 | -1.710026 | 3.396789  |
| H -2.212945 1.541685 1.768767                   | H | -4.630425 | -1.720771 | 2.318358  |

|                                                 |           |           |           |    |           |           |           |
|-------------------------------------------------|-----------|-----------|-----------|----|-----------|-----------|-----------|
| H                                               | 0.475844  | -2.311632 | 1.602213  | C  | -1.106710 | 3.189083  | -2.534301 |
| H                                               | 1.179015  | 1.050966  | -1.294346 | C  | -1.751212 | 1.987104  | -2.266877 |
| H                                               | -3.095411 | -1.287587 | -2.396050 | Ru | 1.037852  | -0.227572 | 0.196763  |
| C                                               | -0.957445 | -3.014481 | -2.157654 | C  | -0.236146 | 0.012917  | 1.978062  |
| H                                               | -0.646583 | -3.336192 | -3.164578 | C  | 0.159116  | -1.330534 | 1.856112  |
| H                                               | -0.248247 | -3.434529 | -1.431891 | C  | 1.530851  | -1.728641 | 1.732297  |
| H                                               | -1.955135 | -3.424836 | -1.956921 | C  | 2.496551  | -0.701547 | 1.712874  |
| C                                               | -0.980951 | 2.843289  | -1.521410 | C  | 2.113905  | 0.669682  | 1.775914  |
| H                                               | -1.896656 | 3.056370  | -0.942087 | C  | 0.742502  | 1.048651  | 1.912881  |
| C                                               | -1.114141 | 3.524871  | -2.886094 | H  | -0.615912 | -2.094540 | 1.779125  |
| H                                               | -2.003854 | 3.178461  | -3.432268 | H  | 2.874571  | 1.444008  | 1.653951  |
| H                                               | -1.196537 | 4.614741  | -2.764171 | H  | -2.753723 | 1.775403  | -2.639135 |
| H                                               | -0.232260 | 3.320455  | -3.513095 | H  | -1.620457 | 3.969688  | -3.099535 |
| C                                               | 0.210588  | 3.395622  | -0.749412 | H  | 0.760327  | 4.285047  | -2.341820 |
| H                                               | 0.068613  | 4.469583  | -0.563499 | H  | 1.873097  | 2.413911  | -1.083697 |
| H                                               | 0.342246  | 2.904222  | 0.225365  | N  | 0.190336  | 1.217983  | -1.095191 |
| H                                               | 1.147209  | 3.289869  | -1.318987 | C  | -2.771469 | -0.577281 | -0.665375 |
| Transition state <b>TS1</b>                     |           |           |           | C  | -0.732655 | -1.365442 | -1.262375 |
| E(SMD/def2-QZVP*) = -1322.898926 E <sub>h</sub> |           |           |           | C  | -2.710488 | -1.959610 | -0.336200 |
| $\Delta\Delta G(353) = 0.393381 E_h$            |           |           |           | C  | -3.873490 | 0.216307  | -0.331315 |
| Lowest frequency = -99.57 cm <sup>-1</sup>      |           |           |           | C  | -1.423549 | -2.432469 | -0.737584 |
| C                                               | -1.059558 | 1.015367  | -1.546047 | C  | -3.809288 | -2.565851 | 0.300188  |
| C                                               | 0.834108  | 2.349235  | -1.411639 | C  | -4.935942 | -0.410770 | 0.304412  |
| C                                               | 0.212565  | 3.369332  | -2.116505 | H  | -3.908803 | 1.282953  | -0.557370 |
|                                                 |           |           |           | H  | -1.045481 | -3.451763 | -0.684402 |

|   |           |           |           |
|---|-----------|-----------|-----------|
| C | -4.910331 | -1.786843 | 0.610061  |
| H | -3.788043 | -3.629868 | 0.545243  |
| H | -5.816862 | 0.177246  | 0.570876  |
| H | -5.773825 | -2.238714 | 1.101980  |
| N | -1.570000 | -0.243721 | -1.264603 |
| O | 2.569473  | -0.016304 | -1.158288 |
| C | 2.824602  | -1.140496 | -1.749856 |
| O | 2.152726  | -2.148858 | -1.536857 |
| C | 4.003127  | -1.130981 | -2.681196 |
| H | 3.937023  | -1.974309 | -3.378473 |
| H | 4.070405  | -0.179618 | -3.224498 |
| H | 4.924386  | -1.239880 | -2.088078 |
| H | 0.189424  | -1.401901 | -1.851797 |
| H | -1.299306 | 0.252649  | 2.012559  |
| H | 3.538960  | -0.952977 | 1.505590  |
| C | 1.905354  | -3.163285 | 1.550841  |
| H | 2.131502  | -3.616461 | 2.529252  |
| H | 1.084839  | -3.729218 | 1.092084  |
| H | 2.783529  | -3.261353 | 0.900741  |
| C | 0.389311  | 2.512964  | 2.014099  |
| H | 1.046607  | 3.045426  | 1.305160  |
| C | 0.741254  | 2.991752  | 3.427339  |
| H | 1.800563  | 2.821296  | 3.668506  |
| H | 0.541682  | 4.068962  | 3.522311  |
| H | 0.133413  | 2.467857  | 4.181038  |

|   |           |          |          |
|---|-----------|----------|----------|
| C | -1.057108 | 2.841140 | 1.670485 |
| H | -1.201074 | 3.930761 | 1.672073 |
| H | -1.349135 | 2.466788 | 0.679603 |
| H | -1.754947 | 2.424526 | 2.413078 |

Intermediate **B**

E(SMD/def2-QZVP\*) = -1322.902812 E<sub>h</sub>

$\Delta\Delta G(353) = 0.394631$  E<sub>h</sub>

Lowest frequency = 13.04 cm<sup>-1</sup>

|    |           |           |           |
|----|-----------|-----------|-----------|
| C  | -1.137809 | 1.022932  | -1.663702 |
| C  | 0.201566  | 2.774323  | -0.952284 |
| C  | -0.588835 | 3.696420  | -1.627106 |
| C  | -1.703773 | 3.241359  | -2.329103 |
| C  | -1.976471 | 1.876633  | -2.369423 |
| Ru | 0.913533  | 0.023873  | 0.238679  |
| C  | -0.390191 | -0.480110 | 1.942280  |
| C  | 0.595291  | -1.489938 | 1.775268  |
| C  | 1.985300  | -1.212927 | 1.742477  |
| C  | 2.360068  | 0.158463  | 1.828621  |
| C  | 1.399855  | 1.184625  | 1.982734  |
| C  | 0.000925  | 0.873900  | 2.049392  |
| H  | 0.266283  | -2.519515 | 1.624357  |
| H  | 1.724221  | 2.227196  | 2.005498  |
| H  | -2.794720 | 1.467539  | -2.962721 |
| H  | -2.339908 | 3.942498  | -2.873541 |

H -0.323711 4.754213 -1.607023  
 H 1.098749 3.070634 -0.406163  
 N -0.095890 1.470896 -0.937130  
 C -2.247491 -1.129375 -1.076855  
 C -0.035334 -1.083681 -1.574498  
 C -1.679680 -2.374806 -0.688289  
 C -3.582551 -0.815519 -0.809686  
 C -0.295224 -2.329944 -1.027613  
 C -2.484855 -3.343059 -0.059736  
 C -4.348595 -1.788584 -0.182872  
 H -4.015769 0.145879 -1.089162  
 H 0.448627 -3.121829 -0.955149  
 C -3.812763 -3.040985 0.183727  
 H -2.067171 -4.311730 0.223410  
 H -5.400718 -1.581251 0.025049  
 H -4.460290 -3.777772 0.662622  
 N -1.247663 -0.368153 -1.655000  
 O 2.415642 0.479398 -1.068826  
 C 3.136378 -0.494123 -1.554132  
 O 2.886801 -1.677417 -1.376195  
 C 4.327172 -0.027643 -2.351993  
 H 4.718773 -0.853036 -2.957766  
 H 4.065338 0.829701 -2.986109  
 H 5.113919 0.306974 -1.658229  
 H 0.786122 -0.828696 -2.241934

H -1.445237 -0.754349 1.914257  
 H 3.407077 0.431825 1.679522  
 C 3.000352 -2.298956 1.600578  
 H 3.359207 -2.597330 2.598790  
 H 2.572587 -3.179931 1.106586  
 H 3.855540 -1.969996 0.998764  
 C -0.987214 1.998074 2.241011  
 H -0.597526 2.861699 1.675172  
 C -0.992862 2.379635 3.725399  
 H 0.010797 2.650436 4.084636  
 H -1.656153 3.240602 3.893150  
 H -1.358792 1.544440 4.342138  
 C -2.391180 1.696152 1.739667  
 H -3.017880 2.595850 1.817242  
 H -2.392590 1.372547 0.689883  
 H -2.879384 0.910751 2.336744

Intermediate C

E(SMD/def2-QZVP\*) = -1322.921971 E<sub>h</sub>

$\Delta\Delta G(353) = 0.395220 E_h$

Lowest frequency = 20.75 cm<sup>-1</sup>

C 1.119389 -0.908314 1.437209  
 C -0.894385 -1.508153 2.449840  
 C -0.247396 -2.160753 3.482779  
 C 1.149168 -2.185382 3.469362

|    |           |           |           |   |           |           |           |
|----|-----------|-----------|-----------|---|-----------|-----------|-----------|
| C  | 1.841502  | -1.564496 | 2.443049  | C | 5.358998  | 0.140367  | -0.108161 |
| Ru | -1.185668 | 0.026387  | -0.143312 | H | 4.302945  | -0.661200 | 1.574783  |
| C  | -1.397998 | 2.170877  | 0.079001  | H | 1.112430  | 1.155853  | -2.577167 |
| C  | -1.681941 | 1.806751  | -1.277509 | C | 5.297481  | 0.722369  | -1.381164 |
| C  | -2.633259 | 0.817959  | -1.582684 | H | 4.021173  | 1.418368  | -2.982134 |
| C  | -3.438817 | 0.209783  | -0.554866 | H | 6.330307  | -0.019786 | 0.364206  |
| C  | -3.197492 | 0.583912  | 0.771484  | H | 6.222299  | 1.002905  | -1.889179 |
| C  | -2.142181 | 1.500964  | 1.083061  | N | 1.655913  | -0.263156 | 0.353111  |
| C  | -0.352212 | 3.215750  | 0.381622  | O | -1.262956 | -1.958160 | -0.910354 |
| H  | -1.081267 | 2.239041  | -2.080541 | C | -0.570869 | -2.599874 | -1.709216 |
| H  | -2.758259 | 0.496234  | -2.618710 | O | 0.499955  | -2.138444 | -2.275782 |
| H  | -3.761825 | 0.111863  | 1.578320  | H | 0.710285  | -1.217435 | -1.953450 |
| H  | -1.900583 | 1.685645  | 2.131289  | C | -0.929767 | -3.993373 | -2.092430 |
| H  | 0.408236  | 3.122782  | -0.411823 | H | -1.024687 | -4.058973 | -3.186121 |
| H  | 2.925587  | -1.602605 | 2.406318  | H | -0.110327 | -4.668036 | -1.803045 |
| H  | 1.701829  | -2.700392 | 4.258059  | H | -1.861126 | -4.300007 | -1.606110 |
| H  | -0.823980 | -2.645417 | 4.270744  | C | 0.348589  | 3.011256  | 1.717568  |
| H  | -1.982984 | -1.473406 | 2.389575  | H | 1.176409  | 3.727183  | 1.818561  |
| N  | -0.234664 | -0.889186 | 1.458698  | H | -0.327375 | 3.182290  | 2.570122  |
| C  | 2.977074  | -0.019406 | -0.045547 | H | 0.769310  | 1.998448  | 1.801732  |
| C  | 0.755125  | 0.208236  | -0.627881 | C | -0.988004 | 4.603718  | 0.278795  |
| C  | 2.901896  | 0.586603  | -1.324928 | H | -0.227241 | 5.384980  | 0.421693  |
| C  | 4.207011  | -0.235579 | 0.578260  | H | -1.457980 | 4.766652  | -0.702724 |
| C  | 1.504595  | 0.714739  | -1.661957 | H | -1.762312 | 4.740783  | 1.049994  |
| C  | 4.073213  | 0.953399  | -1.995372 | C | -4.428968 | -0.846665 | -0.917793 |

H -5.263679 -0.404200 -1.483703  
 H -3.959292 -1.609454 -1.555726  
 H -4.837730 -1.342038 -0.027924

**Intermediate D**

E(SMD/def2-QZVP\*) = -1400.244897 E<sub>h</sub>

ΔΔG(353) = 0.428333 E<sub>h</sub>

Lowest frequency = 9.66 cm<sup>-1</sup>

C -1.083171 1.168299 0.857600  
 C 1.067433 1.675460 1.612911  
 C 0.597494 2.630697 2.491564  
 C -0.781090 2.864631 2.530643  
 C -1.625874 2.139261 1.712865  
 Ru 0.940983 -0.516685 -0.456517  
 C 0.664743 -2.643154 0.237902  
 C 1.214578 -2.617038 -1.072061  
 C 2.442691 -1.956920 -1.335585  
 C 3.104168 -1.313898 -0.245441  
 C 2.499900 -1.252359 1.013476  
 C 1.259623 -1.927496 1.291038  
 H 0.690469 -3.121342 -1.885661  
 H 2.987470 -0.694363 1.816389  
 H -2.695412 2.319374 1.725135  
 H -1.196274 3.621093 3.199915  
 H 1.294866 3.185128 3.119610

H 2.134494 1.483221 1.502827  
 N 0.254466 0.954797 0.820424  
 C -3.159375 0.184322 -0.217065  
 C -1.052528 -0.564314 -0.757053  
 C -3.267569 -0.859404 -1.169945  
 C -4.291690 0.820749 0.290641  
 C -1.932321 -1.303085 -1.490231  
 C -4.528913 -1.264724 -1.616814  
 C -5.537299 0.398412 -0.169370  
 H -4.248816 1.626982 1.019333  
 H -1.677847 -2.075072 -2.213627  
 C -5.657545 -0.630470 -1.111329  
 H -4.621203 -2.066129 -2.352988  
 H -6.435117 0.886591 0.214808  
 H -6.649507 -0.934226 -1.451935  
 N -1.785336 0.351588 0.024094  
 C 1.693538 1.118900 -1.713283  
 H 2.759397 0.948999 -1.884838  
 C 0.716622 0.408394 -2.420723  
 H 0.992790 -0.324175 -3.181276  
 H -0.259776 0.877623 -2.551432  
 C 1.367572 2.492432 -1.234577  
 O 0.275191 2.996942 -1.265422  
 O 2.459624 3.104530 -0.770988  
 H -0.299333 -3.129077 0.391145

|                                                 |           |           |           |    |           |           |           |
|-------------------------------------------------|-----------|-----------|-----------|----|-----------|-----------|-----------|
| H                                               | 4.049433  | -0.793950 | -0.418464 | C  | 1.144630  | 1.576319  | 1.713274  |
| C                                               | 0.675555  | -1.868313 | 2.681492  | C  | 0.757868  | 2.647124  | 2.496555  |
| H                                               | 0.870246  | -0.845982 | 3.050617  | C  | -0.533469 | 3.151925  | 2.331535  |
| C                                               | 1.430735  | -2.846500 | 3.586418  | C  | -1.390678 | 2.558701  | 1.420552  |
| H                                               | 2.513303  | -2.649618 | 3.597284  | Ru | 0.857050  | -0.622098 | -0.366952 |
| H                                               | 1.064072  | -2.767584 | 4.620065  | C  | 0.132678  | -2.640704 | 0.265559  |
| H                                               | 1.279097  | -3.884606 | 3.252424  | C  | 0.739237  | -2.701226 | -1.022563 |
| C                                               | -0.827919 | -2.106288 | 2.723882  | C  | 2.066669  | -2.261272 | -1.246260 |
| H                                               | -1.369639 | -1.453682 | 2.023615  | C  | 2.780541  | -1.719833 | -0.129413 |
| H                                               | -1.083468 | -3.150482 | 2.485796  | C  | 2.155751  | -1.597730 | 1.121544  |
| H                                               | -1.208313 | -1.908957 | 3.735856  | C  | 0.812947  | -2.060884 | 1.349498  |
| C                                               | 3.066579  | -1.990286 | -2.694007 | H  | 0.157679  | -3.080170 | -1.865481 |
| H                                               | 3.503186  | -1.019586 | -2.968396 | H  | 2.694076  | -1.114256 | 1.940141  |
| H                                               | 3.882473  | -2.730261 | -2.700903 | H  | -2.379114 | 2.969633  | 1.232494  |
| H                                               | 2.344500  | -2.284730 | -3.466340 | H  | -0.864773 | 4.024276  | 2.898637  |
| C                                               | 2.287238  | 4.454829  | -0.358421 | H  | 1.463340  | 3.093424  | 3.197656  |
| H                                               | 3.273711  | 4.806230  | -0.037121 | H  | 2.160764  | 1.181878  | 1.749878  |
| H                                               | 1.915314  | 5.067382  | -1.191631 | N  | 0.314395  | 0.976909  | 0.844796  |
| H                                               | 1.565151  | 4.516080  | 0.469019  | C  | -3.074423 | 0.615563  | -0.368214 |
| Transition state <b>TS3</b>                     |           |           |           | C  | -1.031443 | -0.141388 | -1.089812 |
| E(SMD/def2-QZVP*) = -1400.225382 E <sub>h</sub> |           |           |           | C  | -3.279236 | -0.353287 | -1.386269 |
| $\Delta\Delta G(353) = 0.429702 E_h$            |           |           |           | C  | -4.148095 | 1.194727  | 0.309836  |
| Lowest frequency = -294.19 cm <sup>-1</sup>     |           |           |           | C  | -1.992634 | -0.804070 | -1.820356 |
| C                                               | -0.944450 | 1.445406  | 0.700266  | C  | -4.584742 | -0.705707 | -1.758718 |
|                                                 |           |           |           | C  | -5.432537 | 0.820963  | -0.075036 |





|   |           |           |           |   |           |           |           |
|---|-----------|-----------|-----------|---|-----------|-----------|-----------|
| C | 1.247148  | -0.951890 | 1.914348  | C | 0.979659  | 0.603819  | -2.538146 |
| C | -0.184577 | -0.937201 | 2.053807  | H | 1.092638  | 0.332545  | -3.599385 |
| H | -0.864432 | -3.257727 | -0.370594 | H | 1.145885  | 1.686327  | -2.451724 |
| H | 1.845719  | -0.257229 | 2.507949  | C | 3.012848  | 0.654782  | -1.023993 |
| H | -1.843271 | 3.833691  | -1.148074 | O | 3.026852  | 1.860019  | -0.906785 |
| H | -0.680651 | 5.225113  | 0.609139  | O | 4.024663  | -0.118711 | -0.589785 |
| H | 1.159096  | 4.154288  | 1.953321  | H | -2.017842 | -1.783234 | 1.250118  |
| H | 1.719967  | 1.769056  | 1.533079  | H | 2.985005  | -1.754009 | 0.896418  |
| N | 0.228215  | 1.489234  | 0.125026  | C | -0.818561 | -0.003450 | 3.053927  |
| C | -2.522789 | 0.553937  | -1.296234 | H | -0.173975 | 0.891450  | 3.098309  |
| C | -0.389827 | 0.244596  | -2.033593 | C | -0.786127 | -0.664821 | 4.435366  |
| C | -2.377693 | -0.812397 | -1.613292 | H | 0.234032  | -0.955406 | 4.727380  |
| C | -3.702137 | 1.066804  | -0.768404 | H | -1.172820 | 0.026434  | 5.198396  |
| C | -1.004174 | -1.000176 | -2.041689 | H | -1.412012 | -1.570352 | 4.448952  |
| C | -3.457958 | -1.684476 | -1.451059 | C | -2.220570 | 0.448542  | 2.673064  |
| C | -4.763072 | 0.179444  | -0.596344 | H | -2.250325 | 0.874336  | 1.659754  |
| H | -3.803418 | 2.121508  | -0.507520 | H | -2.944272 | -0.380166 | 2.710981  |
| H | -0.604305 | -1.879751 | -2.544074 | H | -2.573273 | 1.214796  | 3.377956  |
| C | -4.648343 | -1.175558 | -0.940665 | C | 1.831280  | -3.629748 | -0.774629 |
| H | -3.372161 | -2.739873 | -1.720333 | H | 2.773678  | -3.200166 | -1.141776 |
| H | -5.709090 | 0.552094  | -0.197970 | H | 2.072569  | -4.579951 | -0.272417 |
| H | -5.508169 | -1.835669 | -0.810659 | H | 1.190449  | -3.862433 | -1.636364 |
| N | -1.304449 | 1.206545  | -1.567014 | C | 5.131148  | 0.565646  | -0.021808 |
| C | 1.910340  | -0.145059 | -1.599909 | H | 5.881167  | -0.198943 | 0.210586  |
| H | 2.291976  | -1.087688 | -2.011174 | H | 5.542326  | 1.298533  | -0.730072 |

|                                                 |           |           |           |   |           |           |           |
|-------------------------------------------------|-----------|-----------|-----------|---|-----------|-----------|-----------|
| H                                               | 4.838008  | 1.100130  | 0.894638  | C | 3.666259  | 0.198961  | 0.265935  |
|                                                 |           |           |           | C | 2.225327  | -1.555729 | 0.396652  |
| Intermediate F                                  |           |           |           | C | 4.286666  | -0.930312 | -0.317678 |
| E(SMD/def2-QZVP*) = -1629.209186 E <sub>h</sub> |           |           |           | C | 4.276012  | 1.454871  | 0.292912  |
| $\Delta\Delta G(353) = 0.487612 E_h$            |           |           |           | C | 3.356341  | -2.020511 | -0.210702 |
| Lowest frequency = 19.48 cm <sup>-1</sup>       |           |           |           | C | 5.563497  | -0.792386 | -0.880103 |
| C                                               | 1.603423  | 0.534662  | 1.568561  | C | 5.543277  | 1.562502  | -0.270323 |
| C                                               | -0.450842 | 1.381488  | 2.188538  | H | 3.784450  | 2.326362  | 0.730528  |
| C                                               | 0.068598  | 1.999447  | 3.311197  | H | 3.503261  | -3.040134 | -0.561375 |
| C                                               | 1.431936  | 1.863057  | 3.573204  | C | 6.180572  | 0.451119  | -0.847475 |
| C                                               | 2.199846  | 1.118663  | 2.695083  | H | 6.060502  | -1.649480 | -1.339499 |
| Ru                                              | -0.735359 | 0.171651  | -0.510448 | H | 6.049236  | 2.530194  | -0.265909 |
| C                                               | -0.979122 | 2.354164  | -1.088014 | H | 7.175487  | 0.572112  | -1.280807 |
| C                                               | 0.280953  | 1.788735  | -1.459529 | N | 2.395451  | -0.194701 | 0.688371  |
| C                                               | 0.393590  | 0.648296  | -2.298541 | C | -0.021807 | -1.834903 | -0.515147 |
| C                                               | -0.829317 | -0.003714 | -2.659429 | C | 0.921745  | -2.232176 | 0.620157  |
| C                                               | -2.063813 | 0.472148  | -2.184608 | H | 1.099811  | -3.318917 | 0.620737  |
| C                                               | -2.166471 | 1.690389  | -1.422486 | H | 0.512061  | -1.985632 | 1.613927  |
| H                                               | 1.201132  | 2.249518  | -1.090485 | H | -1.000836 | 3.239393  | -0.451873 |
| H                                               | -2.961145 | -0.120473 | -2.375646 | H | -0.809076 | -0.952309 | -3.199668 |
| H                                               | 3.264619  | 0.954793  | 2.863530  | C | -3.535214 | 2.145441  | -0.982451 |
| H                                               | 1.885012  | 2.317563  | 4.456805  | H | -4.049644 | 1.236035  | -0.626425 |
| H                                               | -0.587562 | 2.577695  | 3.962907  | C | -4.300506 | 2.679872  | -2.197411 |
| H                                               | -1.506422 | 1.479574  | 1.939404  | H | -4.356346 | 1.938361  | -3.007749 |
| N                                               | 0.286796  | 0.663122  | 1.317530  | H | -5.329395 | 2.945212  | -1.913686 |

|   |           |           |           |                                                 |
|---|-----------|-----------|-----------|-------------------------------------------------|
| H | -3.815514 | 3.582881  | -2.599114 |                                                 |
| C | -3.525657 | 3.159302  | 0.151236  | Transition state <b>TS4</b>                     |
| H | -2.966706 | 2.796004  | 1.026637  | E(SMD/def2-QZVP*) = -1629.183552 E <sub>h</sub> |
| H | -3.083615 | 4.118480  | -0.160482 | $\Delta\Delta G(353) = 0.483402 E_h$            |
| H | -4.554467 | 3.371146  | 0.475962  | Lowest frequency = -1167.57 cm <sup>-1</sup>    |
| C | 1.721323  | 0.163720  | -2.780623 | C -1.473983 -0.384325 1.679431                  |
| H | 1.740224  | -0.927807 | -2.899479 | C 0.521533 -1.297852 2.404378                   |
| H | 1.933328  | 0.607267  | -3.766526 | C -0.033975 -1.705112 3.605076                  |
| H | 2.530721  | 0.452644  | -2.097096 | C -1.376622 -1.425573 3.849538                  |
| O | -2.391526 | -0.371959 | 0.813503  | C -2.097659 -0.752991 2.874992                  |
| C | -2.711535 | -0.859846 | 1.899048  | Ru 0.827355 -0.306453 -0.394946                 |
| O | -2.207807 | -1.955921 | 2.383264  | C 0.593068 -2.371473 -1.044670                  |
| H | -1.737747 | -2.473988 | 1.668017  | C -0.520767 -1.610882 -1.519410                 |
| C | -3.740223 | -0.223521 | 2.772808  | C -0.335113 -0.458957 -2.308204                 |
| H | -4.617147 | -0.885745 | 2.837702  | C 1.014311 -0.029322 -2.548483                  |
| H | -3.344852 | -0.124581 | 3.794125  | C 2.107385 -0.767551 -2.074210                  |
| H | -4.043272 | 0.750954  | 2.375599  | C 1.917851 -1.980743 -1.329330                  |
| C | -1.186129 | -2.717811 | -0.750991 | H -1.536464 -1.903092 -1.241827                 |
| O | -1.780664 | -2.859443 | -1.788552 | H 3.113678 -0.362601 -2.196582                  |
| O | -1.563639 | -3.414996 | 0.365760  | H -3.147538 -0.491638 3.013364                  |
| C | -2.649761 | -4.328975 | 0.203185  | H -1.851230 -1.715979 4.789229                  |
| H | -3.558288 | -3.799040 | -0.115409 | H 0.585066 -2.230574 4.333358                   |
| H | -2.395639 | -5.080181 | -0.555416 | H 1.569897 -1.487547 2.174756                   |
| H | -2.797492 | -4.805151 | 1.178924  | N -0.176163 -0.657271 1.447513                  |
| H | 0.550685  | -1.897519 | -1.449573 | C -3.438173 -0.261444 0.221568                  |

|   |           |           |           |   |           |           |           |
|---|-----------|-----------|-----------|---|-----------|-----------|-----------|
| C | -2.166086 | 1.617332  | 0.356339  | C | 2.838474  | -3.744981 | 0.256479  |
| C | -4.118018 | 0.781688  | -0.450395 | H | 2.317120  | -3.298334 | 1.115732  |
| C | -3.944592 | -1.560784 | 0.296037  | H | 2.228527  | -4.581342 | -0.119918 |
| C | -3.293316 | 1.952868  | -0.339567 | H | 3.779230  | -4.175378 | 0.627762  |
| C | -5.343350 | 0.502906  | -1.073936 | C | -1.494158 | 0.294417  | -2.871856 |
| C | -5.163574 | -1.806729 | -0.327402 | H | -1.313130 | 1.378150  | -2.897647 |
| H | -3.413724 | -2.355910 | 0.824805  | H | -1.650036 | -0.032117 | -3.912755 |
| H | -3.503689 | 2.940486  | -0.745170 | H | -2.417840 | 0.104343  | -2.311207 |
| C | -5.853513 | -0.786870 | -1.005385 | O | 2.566385  | -0.079505 | 0.731899  |
| H | -5.886028 | 1.289124  | -1.603249 | C | 2.688133  | 0.854426  | 1.580531  |
| H | -5.591601 | -2.810605 | -0.288233 | O | 1.751111  | 1.657817  | 1.804078  |
| H | -6.807734 | -1.016098 | -1.484062 | H | 0.984911  | 1.491122  | 0.777702  |
| N | -2.234079 | 0.256207  | 0.694287  | C | 3.987382  | 1.000980  | 2.300851  |
| C | 0.215077  | 1.981122  | -0.217772 | H | 4.533927  | 0.051334  | 2.329413  |
| C | -0.962224 | 2.434227  | 0.655939  | H | 4.596022  | 1.734887  | 1.749176  |
| H | -1.198946 | 3.485633  | 0.445526  | H | 3.820596  | 1.395204  | 3.310779  |
| H | -0.696429 | 2.389140  | 1.725737  | C | 1.261942  | 2.997959  | -0.584207 |
| H | 0.411621  | -3.229974 | -0.397193 | O | 2.192594  | 2.744089  | -1.313153 |
| H | 1.202366  | 0.929811  | -3.035705 | O | 1.064113  | 4.181734  | -0.021864 |
| C | 3.131825  | -2.723321 | -0.831199 | C | 2.039452  | 5.181764  | -0.289789 |
| H | 3.797688  | -1.951981 | -0.409123 | H | 3.024999  | 4.862454  | 0.077951  |
| C | 3.836882  | -3.372142 | -2.026756 | H | 2.111513  | 5.374453  | -1.369287 |
| H | 4.102670  | -2.636304 | -2.799913 | H | 1.708061  | 6.081414  | 0.239683  |
| H | 4.765250  | -3.861115 | -1.697878 | H | -0.191418 | 1.677319  | -1.185960 |
| H | 3.197968  | -4.137825 | -2.493460 |   |           |           |           |

|                                                 |           |           |           |           |           |           |           |
|-------------------------------------------------|-----------|-----------|-----------|-----------|-----------|-----------|-----------|
| Intermediate <b>G</b>                           | C         | -4.091256 | 0.769747  | -0.516733 |           |           |           |
| E(SMD/def2-QZVP*) = -1629.201819 E <sub>h</sub> | C         | -3.852494 | -1.412585 | 0.605635  |           |           |           |
| $\Delta\Delta G(353) = 0.485205 E_h$            | C         | -3.294775 | 1.961493  | -0.609025 |           |           |           |
| Lowest frequency = 17.72 cm <sup>-1</sup>       | C         | -5.323243 | 0.369033  | -1.056127 |           |           |           |
| C                                               | -1.395208 | 0.004595  | 1.727009  | C         | -5.078365 | -1.780178 | 0.060974  |
| C                                               | 0.574829  | -0.900521 | 2.530167  | H         | -3.295944 | -2.094151 | 1.253373  |
| C                                               | 0.076849  | -0.974707 | 3.820490  | H         | -3.535884 | 2.866538  | -1.163209 |
| C                                               | -1.217008 | -0.524586 | 4.066953  | C         | -5.802542 | -0.900757 | -0.763295 |
| C                                               | -1.956473 | -0.024716 | 3.003935  | H         | -5.895842 | 1.047425  | -1.692334 |
| Ru                                              | 0.774241  | -0.462528 | -0.420630 | H         | -5.486958 | -2.768835 | 0.280502  |
| C                                               | 0.369805  | -2.535618 | -0.739099 | H         | -6.761366 | -1.223650 | -1.173866 |
| C                                               | -0.699737 | -1.811113 | -1.348811 | N         | -2.173432 | 0.471040  | 0.654214  |
| C                                               | -0.434702 | -0.798851 | -2.288327 | C         | 0.203967  | 2.113712  | -0.576128 |
| C                                               | 0.940092  | -0.507008 | -2.590727 | C         | -0.961187 | 2.651503  | 0.246137  |
| C                                               | 1.988451  | -1.245392 | -2.025882 | H         | -1.230746 | 3.652530  | -0.115531 |
| C                                               | 1.724550  | -2.291921 | -1.080999 | H         | -0.638223 | 2.766759  | 1.293034  |
| H                                               | -1.730036 | -1.991191 | -1.033603 | H         | 0.139475  | -3.251719 | 0.050615  |
| H                                               | 3.018719  | -0.934300 | -2.207667 | H         | 1.182630  | 0.355743  | -3.215820 |
| H                                               | -2.971660 | 0.352721  | 3.133471  | C         | 2.887741  | -3.009054 | -0.444241 |
| H                                               | -1.640964 | -0.551935 | 5.072989  | H         | 3.577177  | -2.211222 | -0.119214 |
| H                                               | 0.707178  | -1.371902 | 4.617076  | C         | 3.587448  | -3.860560 | -1.508327 |
| H                                               | 1.592010  | -1.211160 | 2.291444  | H         | 3.914143  | -3.261911 | -2.371228 |
| N                                               | -0.145238 | -0.434267 | 1.495603  | H         | 4.479193  | -4.339620 | -1.079161 |
| C                                               | -3.373130 | -0.137324 | 0.297724  | H         | 2.922290  | -4.655735 | -1.879359 |
| C                                               | -2.148488 | 1.765694  | 0.110236  | C         | 2.516133  | -3.845137 | 0.770783  |

|                       |           |           |           |                                                 |
|-----------------------|-----------|-----------|-----------|-------------------------------------------------|
| H                     | 2.000287  | -3.254771 | 1.541905  | E(SMD/def2-QZVP*) = -1629.232680 E <sub>h</sub> |
| H                     | 1.872540  | -4.697370 | 0.500757  | $\Delta\Delta G(353) = 0.484414 E_h$            |
| H                     | 3.424988  | -4.260580 | 1.228274  | Lowest frequency = 15.80 cm <sup>-1</sup>       |
| C                     | -1.540785 | -0.045450 | -2.949165 | C -0.357013 0.878589 1.824906                   |
| H                     | -1.263473 | 0.994789  | -3.167751 | C -0.614787 -1.321201 2.493316                  |
| H                     | -1.762466 | -0.530156 | -3.914004 | C -0.801700 -0.949332 3.816870                  |
| H                     | -2.457229 | -0.050203 | -2.346110 | C -0.772404 0.401711 4.146345                   |
| O                     | 2.516952  | -0.076903 | 0.565696  | C -0.536830 1.323259 3.133369                   |
| C                     | 2.747367  | 0.966851  | 1.316461  | Ru -0.462177 -1.233126 -0.490180                |
| O                     | 1.886879  | 1.761898  | 1.665726  | C -2.291908 -0.146200 -0.986531                 |
| H                     | 0.717637  | 1.366932  | 0.108049  | C -1.259654 0.270398 -1.855581                  |
| C                     | 4.193828  | 1.127749  | 1.695654  | C -0.502870 -0.689998 -2.588344                 |
| H                     | 4.714764  | 1.590235  | 0.842562  | C -0.833870 -2.064661 -2.445033                 |
| H                     | 4.284543  | 1.789039  | 2.565280  | C -1.850229 -2.458843 -1.535363                 |
| H                     | 4.670012  | 0.157787  | 1.888808  | C -2.617350 -1.514756 -0.794288                 |
| C                     | 1.385940  | 3.016461  | -0.854712 | H -0.988007 1.326425 -1.899276                  |
| O                     | 2.352154  | 2.633741  | -1.464985 | H -1.986543 -3.524119 -1.330157                 |
| O                     | 1.226417  | 4.232321  | -0.367705 | H -0.475082 2.394465 3.329340                   |
| C                     | 2.324725  | 5.126059  | -0.520935 | H -0.913933 0.733905 5.177022                   |
| H                     | 3.188235  | 4.757934  | 0.050902  | H -0.968097 -1.719753 4.570923                  |
| H                     | 2.606273  | 5.215542  | -1.579061 | H -0.618188 -2.370358 2.195862                  |
| H                     | 1.990285  | 6.090961  | -0.125926 | N -0.417280 -0.430653 1.502990                  |
| H                     | -0.140686 | 1.736341  | -1.543803 | C -1.099157 2.684887 0.320213                   |
|                       |           |           |           | C 1.084682 2.068493 0.170745                    |
| Intermediate <b>H</b> |           |           |           | C -0.492430 3.451531 -0.705280                  |

|   |           |           |           |   |           |           |           |
|---|-----------|-----------|-----------|---|-----------|-----------|-----------|
| C | -2.442270 | 2.830705  | 0.675294  | H | -4.552965 | -0.079589 | 0.784913  |
| C | 0.883302  | 3.042172  | -0.773715 | H | -4.791586 | -1.413630 | 1.920758  |
| C | -1.275684 | 4.383599  | -1.404598 | C | 0.665640  | -0.257494 | -3.408796 |
| C | -3.190250 | 3.764976  | -0.033187 | H | 1.436157  | -1.037827 | -3.452439 |
| H | -2.887694 | 2.249131  | 1.486093  | H | 0.329926  | -0.043689 | -4.436252 |
| H | 1.654491  | 3.470322  | -1.410340 | H | 1.108537  | 0.658758  | -2.995897 |
| C | -2.613911 | 4.528279  | -1.064324 | O | 0.523189  | -2.876646 | 0.399525  |
| H | -0.835478 | 4.989595  | -2.199575 | C | 1.667630  | -2.375319 | 0.164100  |
| H | -4.241064 | 3.915559  | 0.223236  | O | 1.658564  | -1.269227 | -0.455728 |
| H | -3.230533 | 5.254677  | -1.597531 | H | 3.068479  | 0.879338  | -1.278964 |
| N | -0.131701 | 1.819975  | 0.812302  | C | 2.928988  | -3.034044 | 0.580123  |
| C | 3.443030  | 1.366103  | -0.363279 | H | 3.591489  | -2.287955 | 1.043614  |
| C | 2.338906  | 1.443427  | 0.671780  | H | 2.724720  | -3.872395 | 1.255635  |
| H | 2.691433  | 2.018567  | 1.547203  | H | 3.441993  | -3.410791 | -0.318278 |
| H | 2.144948  | 0.428718  | 1.039113  | C | 4.599096  | 0.530019  | 0.118685  |
| H | -2.774621 | 0.616285  | -0.374310 | O | 4.544853  | -0.264553 | 1.026347  |
| H | -0.222898 | -2.824696 | -2.935082 | O | 5.693418  | 0.751208  | -0.599794 |
| C | -3.704537 | -1.986667 | 0.143475  | C | 6.840654  | -0.016505 | -0.261467 |
| H | -3.313883 | -2.890830 | 0.642860  | H | 7.121754  | 0.147589  | 0.788426  |
| C | -4.931927 | -2.392266 | -0.676808 | H | 6.648521  | -1.089216 | -0.409584 |
| H | -4.689807 | -3.165605 | -1.420772 | H | 7.641887  | 0.320111  | -0.928197 |
| H | -5.718501 | -2.791371 | -0.019863 | H | 3.820505  | 2.354466  | -0.663617 |
| H | -5.346970 | -1.525256 | -1.214138 |   |           |           |           |
| C | -4.072162 | -0.971026 | 1.217431  |   |           |           |           |
| H | -3.196453 | -0.643793 | 1.796999  |   |           |           |           |

Intermediate **A**<sup>benzene</sup>

E(SMD/def2-QZVP\*) = -1165.763414 E<sub>h</sub>

$\Delta\Delta G(353) = 0.293233 E_h$

Lowest frequency = 25.71  $\text{cm}^{-1}$

|    |           |           |           |
|----|-----------|-----------|-----------|
| C  | 0.657195  | 1.686180  | 0.107044  |
| C  | -1.349097 | 2.282338  | -0.894029 |
| C  | -0.901843 | 3.570292  | -1.140928 |
| C  | 0.387532  | 3.919379  | -0.744510 |
| C  | 1.168899  | 2.968055  | -0.103838 |
| Ru | -1.324716 | -0.642325 | -0.277173 |
| C  | 0.284985  | -1.312549 | -1.595849 |
| C  | 0.342209  | -2.060555 | -0.401883 |
| C  | -0.833091 | -2.715887 | 0.063934  |
| C  | -2.038058 | -2.657193 | -0.671331 |
| C  | -2.081166 | -1.871996 | -1.857916 |
| C  | -0.923949 | -1.209659 | -2.336667 |
| H  | 1.250906  | -2.060111 | 0.202582  |
| H  | -3.038827 | -1.707417 | -2.357042 |
| H  | 2.171064  | 3.196043  | 0.261543  |
| H  | 0.772759  | 4.927369  | -0.913169 |
| H  | -1.562274 | 4.283360  | -1.636004 |
| H  | -2.356154 | 1.966922  | -1.170619 |
| N  | -0.581226 | 1.345656  | -0.304080 |
| C  | 2.703185  | 0.318638  | 0.294798  |
| C  | 1.171711  | 0.093133  | 1.947593  |
| C  | 3.206166  | -0.602487 | 1.246407  |
| C  | 3.398064  | 0.645253  | -0.873338 |

|   |           |           |           |
|---|-----------|-----------|-----------|
| C | 2.217688  | -0.714440 | 2.286330  |
| C | 4.453806  | -1.203649 | 1.016479  |
| C | 4.629659  | 0.032474  | -1.072511 |
| H | 3.002705  | 1.358284  | -1.600428 |
| H | 2.286276  | -1.314453 | 3.191189  |
| C | 5.151888  | -0.879829 | -0.137928 |
| H | 4.865674  | -1.914283 | 1.736283  |
| H | 5.204319  | 0.267991  | -1.970749 |
| H | 6.124493  | -1.338269 | -0.327515 |
| N | 1.447880  | 0.725103  | 0.737007  |
| O | -3.163107 | 0.291719  | 0.123453  |
| C | -2.932690 | 0.313960  | 1.373089  |
| O | -1.850548 | -0.233876 | 1.737604  |
| C | -3.850377 | 0.977224  | 2.332783  |
| H | -3.803458 | 0.480929  | 3.310070  |
| H | -3.526053 | 2.021713  | 2.464658  |
| H | -4.875753 | 0.980543  | 1.943474  |
| H | 0.232709  | 0.287484  | 2.460408  |
| H | 1.161020  | -0.731994 | -1.895125 |
| H | -2.949824 | -3.107765 | -0.276842 |
| H | -0.982535 | -0.569311 | -3.217889 |
| H | -0.823153 | -3.194866 | 1.045499  |

Transition state **TS1**<sup>benzene</sup>

$E(\text{SMD}/\text{def2-QZVP}^*) = -1165.743738 E_h$



$\Delta\Delta G(353) = 0.291709 E_h$

Lowest frequency =  $-114.98 \text{ cm}^{-1}$

|    |           |           |           |
|----|-----------|-----------|-----------|
| C  | 0.782371  | 1.801518  | 0.333130  |
| C  | -1.214413 | 2.601578  | -0.541979 |
| C  | -0.739090 | 3.904568  | -0.535573 |
| C  | 0.559418  | 4.142881  | -0.083843 |
| C  | 1.330273  | 3.081660  | 0.376559  |
| Ru | -1.062850 | -0.437224 | -0.405677 |
| C  | 0.015161  | -0.611034 | -2.289521 |
| C  | 0.381561  | -1.699232 | -1.481350 |
| C  | -0.634672 | -2.507169 | -0.881023 |
| C  | -1.998711 | -2.263263 | -1.126657 |
| C  | -2.365783 | -1.141796 | -1.927142 |
| C  | -1.366671 | -0.311115 | -2.500125 |
| H  | 1.430373  | -1.862236 | -1.227486 |
| H  | -3.416152 | -0.856735 | -2.011660 |
| H  | 2.321132  | 3.233107  | 0.805418  |
| H  | 0.959132  | 5.158940  | -0.057840 |
| H  | -1.382526 | 4.718041  | -0.872700 |
| H  | -2.229033 | 2.350939  | -0.856832 |
| N  | -0.450354 | 1.571450  | -0.153619 |
| C  | 2.681442  | 0.182578  | 0.520819  |
| C  | 0.684258  | -0.337650 | 1.455077  |
| C  | 2.755030  | -1.143982 | 1.030631  |
| C  | 3.733453  | 0.759860  | -0.197362 |

|   |           |           |           |
|---|-----------|-----------|-----------|
| C | 1.490957  | -1.440318 | 1.624703  |
| C | 3.937414  | -1.886883 | 0.852097  |
| C | 4.881320  | -0.002519 | -0.361176 |
| H | 3.667820  | 1.766749  | -0.612018 |
| H | 1.202827  | -2.344522 | 2.157715  |
| C | 4.987779  | -1.307524 | 0.162630  |
| H | 4.018286  | -2.900441 | 1.250468  |
| H | 5.726438  | 0.421692  | -0.907638 |
| H | 5.914562  | -1.865511 | 0.016145  |
| N | 1.422079  | 0.669860  | 0.821843  |
| O | -2.717690 | 0.300686  | 0.569518  |
| C | -2.880080 | -0.368240 | 1.667111  |
| O | -2.079887 | -1.244339 | 1.996619  |
| C | -4.091507 | -0.015123 | 2.478367  |
| H | -4.047705 | -0.507768 | 3.456170  |
| H | -4.168868 | 1.074105  | 2.599182  |
| H | -4.994630 | -0.347276 | 1.944512  |
| H | -0.249055 | -0.118308 | 1.979048  |
| H | 0.784124  | 0.065321  | -2.669161 |
| H | -2.760395 | -2.838292 | -0.599024 |
| H | -1.656582 | 0.585325  | -3.052310 |
| H | -0.352868 | -3.267967 | -0.151096 |

Intermediate **B**<sup>benzene</sup>

E(SMD/def2-QZVP\*) =  $-1165.748628 E_h$

$\Delta\Delta G(353) = 0.291483 E_h$

Lowest frequency = 27.63  $\text{cm}^{-1}$

C -0.872928 1.840711 -0.482751

C 0.992469 2.805054 0.497802

C 0.454689 4.076939 0.349050

C -0.807215 4.210067 -0.228439

C -1.481642 3.075839 -0.671898

Ru 0.950544 -0.275492 0.464739

C -0.245782 -1.583167 1.740486

C 0.816012 -2.341553 1.148879

C 2.146961 -1.909932 1.267026

C 2.441249 -0.698994 1.965428

C 1.391577 0.049176 2.545131

C 0.039182 -0.406114 2.451831

H 0.591067 -3.208186 0.526630

H 1.609152 1.010222 3.016416

H -2.438547 3.140048 -1.190693

H -1.252845 5.197882 -0.363792

H 1.024056 4.947723 0.676335

H 1.983091 2.641710 0.925920

N 0.321534 1.710320 0.123535

C -2.576312 0.013254 -0.607758

C -0.466530 -0.356930 -1.355652

C -2.446270 -1.375844 -0.908330

C -3.735889 0.532514 -0.020101

C -1.130132 -1.579245 -1.394473

C -3.528918 -2.247370 -0.663702

C -4.776479 -0.353199 0.210551

H -3.828834 1.587896 0.239208

H -0.686145 -2.496012 -1.780082

C -4.682551 -1.726273 -0.113368

H -3.449327 -3.308743 -0.907961

H -5.701835 0.022281 0.653344

H -5.537196 -2.377189 0.079811

N -1.388440 0.625627 -0.931819

O 2.362415 0.237924 -0.912584

C 2.755382 -0.700451 -1.735812

O 2.246433 -1.809750 -1.786420

C 3.906237 -0.287998 -2.616130

H 4.023699 -1.003446 -3.438112

H 3.757894 0.728503 -3.004393

H 4.830050 -0.276308 -2.017610

H 0.359443 -0.060576 -2.003663

H -1.283854 -1.881977 1.581431

H 3.459430 -0.306671 1.974322

H 2.930080 -2.436442 0.720815

H -0.774405 0.205017 2.846955

Intermediate C<sup>benzene</sup>

E(SMD/def2-QZVP\*) = -1165.767420  $E_h$

$\Delta\Delta G(353) = 0.292779 E_h$

Lowest frequency = 27.29  $\text{cm}^{-1}$

C 0.805244 1.623359 -0.289833  
C -1.281538 2.665136 -0.214792  
C -0.715260 3.924487 -0.153893  
C 0.678737 4.016730 -0.154973  
C 1.447692 2.866757 -0.216699  
Ru -1.374813 -0.358401 -0.285413  
C -1.605765 -1.247295 -2.227323  
C -1.781468 -2.268322 -1.245290  
C -2.723223 -2.092570 -0.214320  
C -3.579290 -0.941849 -0.204382  
C -3.441557 0.046871 -1.178688  
C -2.399513 -0.079354 -2.154448  
H -1.127469 -3.141533 -1.244921  
H -2.795598 -2.830158 0.586547  
H -4.067506 0.940595 -1.150837  
H -2.212038 0.736925 -2.855472  
H 2.531069 2.925357 -0.190635  
H 1.169416 4.990708 -0.097327  
H -1.350708 4.808406 -0.097520  
H -2.363008 2.524964 -0.193142  
N -0.546771 1.544475 -0.292586  
C 2.771541 0.019594 -0.356631  
C 0.596594 -0.741408 -0.268046

C 2.787417 -1.394918 -0.268962  
C 3.957511 0.747962 -0.464741  
C 1.416197 -1.841857 -0.215338  
C 4.004933 -2.083148 -0.264773  
C 5.156916 0.040488 -0.459809  
H 3.985519 1.830136 -0.571305  
H 1.091816 -2.879922 -0.160527  
C 5.184994 -1.356568 -0.356260  
H 4.022381 -3.172876 -0.196083  
H 6.094993 0.592760 -0.544685  
H 6.145139 -1.876290 -0.355393  
N 1.422588 0.400701 -0.335629  
O -1.372909 -0.045994 1.814468  
C -0.636358 -0.391194 2.746253  
O 0.457129 -1.070868 2.595680  
H 0.650864 -1.236101 1.631205  
C -0.962554 -0.034737 4.154356  
H -0.956610 -0.942936 4.773997  
H -0.173908 0.624614 4.547231  
H -1.934196 0.465812 4.210879  
H -4.288991 -0.806293 0.614087  
H -0.821387 -1.334835 -2.980050

Intermediate **D**<sup>benzene</sup>

E(SMD/def2-QZVP\*) = -1243.089690  $E_h$

$\Delta\Delta G(353) = 0.325409 E_h$

Lowest frequency = 13.38  $\text{cm}^{-1}$

C -0.724791 1.230779 0.841234

C 1.519093 1.653520 1.344714

C 1.221608 2.875048 1.913249

C -0.116801 3.284307 1.927458

C -1.093278 2.469343 1.388808

Ru 1.004758 -1.003284 0.016392

C 0.494740 -2.953742 1.026249

C 1.214125 -3.216598 -0.160178

C 2.481114 -2.604601 -0.352710

C 3.083173 -1.823638 0.672798

C 2.326164 -1.515456 1.809269

C 1.013950 -2.054682 1.981612

H 0.787558 -3.854699 -0.935613

H 2.729145 -0.839763 2.567096

H -2.131635 2.783160 1.377842

H -0.395888 4.249256 2.355975

H 2.018919 3.494412 2.324004

H 2.547404 1.300125 1.264938

N 0.574699 0.844872 0.830888

C -2.957437 0.276827 0.109658

C -0.989771 -0.856477 -0.240065

C -3.237291 -0.944399 -0.552264

C -3.977433 1.161843 0.457359

C -1.984132 -1.630338 -0.758731

C -4.556974 -1.274775 -0.874704

C -5.284247 0.810481 0.125818

H -3.802616 2.103914 0.972050

H -1.859281 -2.585823 -1.264935

C -5.573376 -0.390629 -0.533217

H -4.781042 -2.212610 -1.387441

H -6.096408 1.491475 0.387770

H -6.609165 -0.632654 -0.779694

N -1.565081 0.313186 0.291675

C 1.834394 0.126941 -1.683340

H 2.898129 -0.115064 -1.759657

C 0.851321 -0.746255 -2.157531

H 1.123266 -1.691001 -2.633927

H -0.112779 -0.327126 -2.449618

C 1.531374 1.587809 -1.664637

O 0.440591 2.069041 -1.829907

O 2.638915 2.297503 -1.450265

H -0.509731 -3.360567 1.155912

H 4.082139 -1.405402 0.536238

C 2.488097 3.712016 -1.482735

H 3.488157 4.130771 -1.327344

H 2.083908 4.033577 -2.452653

H 1.801936 4.043273 -0.689603

H 0.424041 -1.791417 2.860874

|                                                 |           |           |           |   |           |           |           |
|-------------------------------------------------|-----------|-----------|-----------|---|-----------|-----------|-----------|
| H                                               | 3.019472  | -2.772060 | -1.288694 | C | -2.974251 | 0.546031  | -0.081126 |
|                                                 |           |           |           | C | -1.066152 | -0.625900 | -0.580027 |
| Transition state <b>TS3</b> <sup>benzene</sup>  |           |           |           | C | -3.337793 | -0.669002 | -0.720389 |
| E(SMD/def2-QZVP*) = -1243.071195 E <sub>h</sub> |           |           |           | C | -3.941679 | 1.431660  | 0.396522  |
| $\Delta\Delta G(353) = 0.327083 E_h$            |           |           |           | C | -2.132319 | -1.377921 | -1.021173 |
| Lowest frequency = -293.46 cm <sup>-1</sup>     |           |           |           | C | -4.692208 | -0.972569 | -0.923045 |
| C                                               | -0.704984 | 1.431119  | 0.583578  | C | -5.277674 | 1.102678  | 0.187281  |
| C                                               | 1.463492  | 1.656745  | 1.396683  | H | -3.693487 | 2.346896  | 0.930314  |
| C                                               | 1.233585  | 2.956224  | 1.804383  | H | -2.063904 | -2.318019 | -1.565510 |
| C                                               | -0.019410 | 3.516416  | 1.545574  | C | -5.651688 | -0.078825 | -0.472309 |
| C                                               | -0.994871 | 2.757511  | 0.923031  | H | -4.980521 | -1.900870 | -1.420609 |
| Ru                                              | 0.842363  | -1.033669 | 0.131174  | H | -6.051208 | 1.783487  | 0.548394  |
| C                                               | 0.097712  | -2.638989 | 1.517153  | H | -6.710899 | -0.296998 | -0.621848 |
| C                                               | 0.441376  | -3.176944 | 0.242586  | N | -1.579356 | 0.563222  | -0.019647 |
| C                                               | 1.735616  | -2.991539 | -0.294736 | C | 1.607987  | -0.159162 | -1.660736 |
| C                                               | 2.702207  | -2.233134 | 0.429195  | H | 2.336429  | -0.870064 | -2.059321 |
| C                                               | 2.345169  | -1.641046 | 1.652211  | C | 0.226846  | -0.324166 | -2.005691 |
| C                                               | 1.034632  | -1.843161 | 2.192526  | H | -0.035104 | -1.165966 | -2.649153 |
| H                                               | -0.307786 | -3.723629 | -0.332496 | H | -0.298867 | 0.607120  | -2.243985 |
| H                                               | 3.061927  | -1.010645 | 2.181075  | C | 2.121139  | 1.229060  | -1.550858 |
| H                                               | -1.957125 | 3.189484  | 0.661528  | O | 1.444384  | 2.225250  | -1.626910 |
| H                                               | -0.228566 | 4.554531  | 1.811920  | O | 3.441050  | 1.243808  | -1.348548 |
| H                                               | 2.027682  | 3.524805  | 2.288725  | H | -0.914170 | -2.755354 | 1.908227  |
| H                                               | 2.440991  | 1.188200  | 1.515579  | H | 3.689142  | -2.046508 | 0.001501  |
| N                                               | 0.518545  | 0.903763  | 0.809370  | C | 4.049508  | 2.528119  | -1.299256 |

H 5.121351 2.355338 -1.153633  
H 3.875047 3.075015 -2.236554  
H 3.638707 3.122275 -0.469776  
H 0.750694 -1.338953 3.118577  
H 1.980459 -3.399286 -1.277275

Intermediate **E<sup>benzene</sup>**

E(SMD/def2-QZVP\*) = -1243.095101 E<sub>h</sub>

$\Delta\Delta G(353) = 0.329739 E_h$

Lowest frequency = 30.38 cm<sup>-1</sup>

C -0.610975 2.017348 -0.138733  
C 1.208184 1.926952 1.282994  
C 1.100824 3.282278 1.562107  
C 0.091364 4.019813 0.950716  
C -0.773316 3.378567 0.067728  
Ru 0.350065 -0.822535 0.141856  
C -0.835138 -1.714481 1.868602  
C -0.750909 -2.622933 0.787503  
C 0.498066 -3.004441 0.223884  
C 1.690722 -2.425928 0.725042  
C 1.629021 -1.479813 1.777575  
C 0.360825 -1.116862 2.321372  
H -1.673502 -3.018169 0.357840  
H 2.543734 -1.003110 2.132916  
H -1.546497 3.915268 -0.482520

H -0.006147 5.091468 1.136263  
H 1.819032 3.750707 2.235873  
H 2.010281 1.328594 1.713917  
N 0.349437 1.290904 0.475141  
C -2.643841 0.733696 -0.576864  
C -0.690175 0.219195 -1.628343  
C -2.713803 -0.621151 -0.961496  
C -3.662482 1.350160 0.140784  
C -1.447222 -0.944879 -1.588034  
C -3.862793 -1.367444 -0.681162  
C -4.791871 0.585635 0.427393  
H -3.593542 2.392405 0.456446  
H -1.225507 -1.845450 -2.159661  
C -4.898291 -0.750764 0.013064  
H -3.949095 -2.407820 -1.003956  
H -5.618727 1.043079 0.974804  
H -5.808599 -1.309986 0.237686  
N -1.408425 1.254639 -1.005955  
C 1.602746 -0.401911 -1.521774  
H 1.849981 -1.358549 -1.998804  
C 0.628557 0.451644 -2.313651  
H 0.567019 0.191075 -3.381362  
H 0.910971 1.511231 -2.244552  
C 2.831855 0.284786 -1.064165  
O 2.975979 1.482113 -0.964394

|                                                 |           |           |           |   |           |           |           |
|-------------------------------------------------|-----------|-----------|-----------|---|-----------|-----------|-----------|
| O                                               | 3.794409  | -0.587641 | -0.717456 | C | 1.009191  | 1.160495  | 3.020865  |
| H                                               | -1.803437 | -1.419639 | 2.274521  | H | -2.123399 | 0.628315  | 1.735440  |
| H                                               | 2.651227  | -2.635641 | 0.251079  | H | 2.530349  | -0.409730 | 3.200740  |
| C                                               | 5.016952  | -0.021064 | -0.269505 | H | -2.857226 | 1.806148  | -2.511301 |
| H                                               | 5.699588  | -0.859755 | -0.092029 | H | -1.822720 | 4.073396  | -2.837979 |
| H                                               | 5.434944  | 0.655372  | -1.028141 | H | 0.349970  | 4.572798  | -1.638170 |
| H                                               | 4.870445  | 0.552214  | 0.658617  | H | 1.344627  | 2.808771  | -0.205513 |
| H                                               | 0.311571  | -0.329318 | 3.077429  | N | -0.139649 | 1.408972  | -0.559538 |
| H                                               | 0.533424  | -3.697452 | -0.617760 | C | -3.252654 | -0.249744 | -0.584645 |
|                                                 |           |           |           | C | -1.356308 | -1.338699 | -1.212075 |
| Intermediate <b>F<sup>benzene</sup></b>         |           |           |           | C | -3.513153 | -1.640840 | -0.571628 |
| E(SMD/def2-QZVP*) = -1472.052792 E <sub>h</sub> |           |           |           | C | -4.206242 | 0.692931  | -0.194400 |
| $\Delta\Delta G(353) = 0.384520 E_h$            |           |           |           | C | -2.302023 | -2.298160 | -0.982279 |
| Lowest frequency = 30.36 cm <sup>-1</sup>       |           |           |           | C | -4.780251 | -2.092560 | -0.176076 |
| C                                               | -1.308306 | 1.144586  | -1.181972 | C | -5.453058 | 0.215039  | 0.196524  |
| C                                               | 0.416246  | 2.624197  | -0.746964 | H | -3.995080 | 1.764373  | -0.192659 |
| C                                               | -0.148592 | 3.607891  | -1.538659 | H | -2.150534 | -3.368214 | -1.110048 |
| C                                               | -1.350901 | 3.331863  | -2.189779 | C | -5.737983 | -1.160628 | 0.200997  |
| C                                               | -1.930039 | 2.086376  | -2.010166 | H | -5.006203 | -3.160945 | -0.161538 |
| Ru                                              | 0.694338  | 0.208434  | 1.004912  | H | -6.223935 | 0.924720  | 0.503936  |
| C                                               | -0.296231 | 1.456796  | 2.621219  | H | -6.728851 | -1.499169 | 0.510373  |
| C                                               | -1.134648 | 0.400649  | 2.140252  | N | -1.921840 | -0.083583 | -0.969168 |
| C                                               | -0.702789 | -0.943763 | 2.167504  | C | 0.941959  | -1.470395 | -0.311461 |
| C                                               | 0.623745  | -1.240251 | 2.612521  | C | 0.076321  | -1.482047 | -1.575105 |
| C                                               | 1.482719  | -0.192233 | 2.987264  | H | 0.207578  | -2.431552 | -2.114309 |

|                                                 |           |           |           |                                              |
|-------------------------------------------------|-----------|-----------|-----------|----------------------------------------------|
| H                                               | 0.363879  | -0.700496 | -2.303094 | Lowest frequency = -1117.34 cm <sup>-1</sup> |
| H                                               | -0.641381 | 2.491696  | 2.584064  | C 1.253463 -0.997443 -1.341474               |
| H                                               | 1.012748  | -2.258681 | 2.567259  | C -0.275499 -2.686942 -0.939548              |
| O                                               | 2.613591  | 0.978121  | 0.477699  | C 0.277346 -3.494052 -1.920186               |
| C                                               | 3.293038  | 0.976963  | -0.546910 | C 1.361537 -3.014359 -2.650645               |
| O                                               | 2.801262  | 0.663434  | -1.720001 | C 1.849863 -1.749589 -2.355218               |
| H                                               | 1.877782  | 0.368499  | -1.612142 | Ru -0.686616 -0.444781 0.998428              |
| C                                               | 4.738806  | 1.305535  | -0.535457 | C 0.326119 -1.668697 2.491851                |
| H                                               | 5.270341  | 0.368078  | -0.301750 | C 1.179825 -0.583422 2.120589                |
| H                                               | 5.076984  | 1.670519  | -1.512213 | C 0.719163 0.743103 2.202649                 |
| H                                               | 4.958140  | 2.024209  | 0.262420  | C -0.619136 0.996270 2.640973                |
| C                                               | 2.372325  | -1.873538 | -0.516469 | C -1.471958 -0.062693 2.996612               |
| O                                               | 3.220919  | -1.874778 | 0.346828  | C -0.989118 -1.404112 2.919526               |
| O                                               | 2.624269  | -2.256312 | -1.772964 | H 2.174306 -0.777560 1.712243                |
| C                                               | 3.952255  | -2.663634 | -2.065813 | H -2.518341 0.136207 3.230811                |
| H                                               | 4.300406  | -3.413823 | -1.342976 | H 2.691555 -1.314690 -2.895688               |
| H                                               | 3.929988  | -3.082626 | -3.077857 | H 1.816172 -3.613173 -3.442718               |
| H                                               | 4.633216  | -1.799630 | -2.036013 | H -0.145011 -4.482910 -2.103264              |
| H                                               | 0.552338  | -2.287940 | 0.315931  | H -1.128331 -3.020187 -0.347340              |
| H                                               | -1.359116 | -1.728311 | 1.785444  | N 0.195825 -1.461467 -0.646111               |
| H                                               | 1.698753  | 1.966112  | 3.280551  | C 3.110163 0.390804 -0.537021                |
| Transition state <b>TS4</b> <sup>benzene</sup>  |           |           |           | C 1.245323 1.504595 -1.206051                |
| E(SMD/def2-QZVP*) = -1472.030998 E <sub>h</sub> |           |           |           | C 3.356363 1.779095 -0.412687                |
| ΔΔG(353) = 0.379853 E <sub>h</sub>              |           |           |           | C 4.056401 -0.574543 -0.184233               |
|                                                 |           |           |           | C 2.164974 2.453344 -0.849116                |



|   |           |           |           |                                                 |           |           |           |
|---|-----------|-----------|-----------|-------------------------------------------------|-----------|-----------|-----------|
| C | 4.598624  | 2.206257  | 0.080649  | O                                               | -2.720425 | 2.749770  | -1.490051 |
| C | 5.277205  | -0.120316 | 0.303807  | C                                               | -4.007961 | 3.353321  | -1.556355 |
| H | 3.858116  | -1.643439 | -0.292778 | H                                               | -4.154665 | 4.046464  | -0.716484 |
| H | 2.007367  | 3.528499  | -0.909592 | H                                               | -4.044291 | 3.890822  | -2.509798 |
| C | 5.544483  | 1.253701  | 0.434265  | H                                               | -4.791440 | 2.583093  | -1.521059 |
| H | 4.815730  | 3.271643  | 0.183833  | H                                               | -0.590658 | 1.883203  | 0.448849  |
| H | 6.043441  | -0.845559 | 0.585604  | H                                               | 1.358833  | 1.557099  | 1.853103  |
| H | 6.515281  | 1.573468  | 0.818224  | H                                               | -1.678313 | -2.233239 | 3.090591  |
| N | 1.806519  | 0.240434  | -1.002112 |                                                 |           |           |           |
| C | -1.081305 | 1.424705  | -0.413635 | Intermediate <b>G<sup>benzene</sup></b>         |           |           |           |
| C | -0.171812 | 1.669982  | -1.621612 | E(SMD/def2-QZVP*) = -1472.048548 E <sub>h</sub> |           |           |           |
| H | -0.313273 | 2.695040  | -1.990091 | $\Delta\Delta G(353) = 0.382223$ E <sub>h</sub> |           |           |           |
| H | -0.433645 | 1.000491  | -2.457488 | Lowest frequency = 23.86 cm <sup>-1</sup>       |           |           |           |
| H | 0.662891  | -2.699739 | 2.369502  | C                                               | -1.094181 | -0.339352 | 1.674458  |
| H | -1.024310 | 2.010190  | 2.617260  | C                                               | 0.387513  | -2.113315 | 1.811824  |
| O | -2.460897 | -1.383850 | 0.477437  | C                                               | -0.005841 | -2.405413 | 3.108478  |
| C | -3.007448 | -1.169852 | -0.649398 | C                                               | -0.974341 | -1.609571 | 3.711852  |
| O | -2.464776 | -0.434282 | -1.506932 | C                                               | -1.521842 | -0.561888 | 2.981647  |
| H | -1.614302 | 0.251481  | -0.783053 | Ru                                              | 0.543946  | -0.822428 | -0.887678 |
| C | -4.333830 | -1.795522 | -0.923814 | C                                               | -0.506447 | -2.478227 | -1.726790 |
| H | -5.108589 | -1.070144 | -0.628262 | C                                               | -1.413300 | -1.371757 | -1.694732 |
| H | -4.447981 | -1.995025 | -1.996146 | C                                               | -1.047502 | -0.146015 | -2.274450 |
| H | -4.473389 | -2.706256 | -0.330106 | C                                               | 0.232744  | -0.021996 | -2.894252 |
| C | -2.447439 | 2.062158  | -0.392555 | C                                               | 1.122551  | -1.112095 | -2.972674 |
| O | -3.200715 | 1.942996  | 0.544087  | C                                               | 0.746849  | -2.345754 | -2.372486 |

|   |           |           |           |   |           |           |           |
|---|-----------|-----------|-----------|---|-----------|-----------|-----------|
| H | -2.353505 | -1.442967 | -1.143583 | H | -0.750859 | -3.403273 | -1.201166 |
| H | 2.126645  | -0.975832 | -3.375844 | H | 0.566469  | 0.953812  | -3.254935 |
| H | -2.283512 | 0.098232  | 3.398486  | O | 2.345363  | -1.475792 | -0.225840 |
| H | -1.297260 | -1.797456 | 4.738044  | C | 3.034339  | -0.924055 | 0.740944  |
| H | 0.456152  | -3.242476 | 3.633346  | O | 2.586838  | -0.075085 | 1.497892  |
| H | 1.160474  | -2.691485 | 1.304147  | H | 1.295879  | 0.603958  | 0.139536  |
| N | -0.145405 | -1.106043 | 1.101852  | C | 4.455375  | -1.404722 | 0.815929  |
| C | -3.038442 | 0.583254  | 0.501515  | H | 5.038862  | -0.812295 | 0.093348  |
| C | -1.204260 | 1.920157  | 0.570131  | H | 4.859289  | -1.230197 | 1.820180  |
| C | -3.354628 | 1.798201  | -0.152552 | H | 4.543095  | -2.460914 | 0.532120  |
| C | -3.956778 | -0.462172 | 0.631828  | C | 2.580167  | 2.106901  | -0.263566 |
| C | -2.180396 | 2.622006  | -0.086260 | O | 3.350214  | 1.649517  | -1.068328 |
| C | -4.636851 | 1.959239  | -0.701595 | O | 2.873388  | 3.013645  | 0.648465  |
| C | -5.217406 | -0.273170 | 0.076395  | C | 4.238958  | 3.412337  | 0.729806  |
| H | -3.705677 | -1.386335 | 1.157884  | H | 4.853616  | 2.563381  | 1.061033  |
| H | -2.072341 | 3.637051  | -0.463927 | H | 4.599686  | 3.759884  | -0.247769 |
| C | -5.551933 | 0.922639  | -0.584602 | H | 4.277426  | 4.220553  | 1.467488  |
| H | -4.908529 | 2.887248  | -1.209393 | H | 0.719875  | 1.807114  | -1.210947 |
| H | -5.963970 | -1.065548 | 0.162112  | H | -1.697918 | 0.724185  | -2.158726 |
| H | -6.552898 | 1.036143  | -1.005628 | H | 1.478987  | -3.152063 | -2.297665 |
| N | -1.712840 | 0.663096  | 0.912730  |   |           |           |           |
| C | 1.129218  | 1.674699  | -0.204959 |   |           |           |           |
| C | 0.209964  | 2.298360  | 0.835873  |   |           |           |           |
| H | 0.297753  | 3.392121  | 0.787195  |   |           |           |           |
| H | 0.538743  | 1.996610  | 1.842327  |   |           |           |           |

Intermediate **H**<sup>benzene</sup>

E(SMD/def2-QZVP\*) = -1472.077144 E<sub>h</sub>

$\Delta\Delta G(353) = 0.381587$  E<sub>h</sub>

Lowest frequency = 15.97 cm<sup>-1</sup>

|    |           |           |           |   |           |           |           |
|----|-----------|-----------|-----------|---|-----------|-----------|-----------|
| C  | -0.794504 | 0.462369  | 1.773284  | C | -4.475922 | 2.293862  | 0.077915  |
| C  | -0.419628 | -1.722563 | 2.441071  | H | -3.635580 | 0.976806  | 1.580661  |
| C  | -0.594274 | -1.396081 | 3.778370  | H | 0.139800  | 3.513134  | -1.553440 |
| C  | -0.883094 | -0.078573 | 4.116777  | C | -4.221312 | 3.182002  | -0.982556 |
| C  | -0.977426 | 0.859685  | 3.095912  | H | -2.737657 | 4.160558  | -2.209559 |
| Ru | -0.409404 | -1.613604 | -0.543313 | H | -5.506201 | 2.114735  | 0.392587  |
| C  | -2.510892 | -1.146346 | -0.938434 | H | -5.060942 | 3.671310  | -1.480301 |
| C  | -1.708234 | -0.442812 | -1.864459 | N | -0.922712 | 1.414850  | 0.753693  |
| C  | -0.742093 | -1.159554 | -2.620610 | C | 2.553090  | 2.111177  | -0.588355 |
| C  | -0.599504 | -2.560809 | -2.481861 | C | 1.529293  | 1.848051  | 0.498049  |
| C  | -1.396125 | -3.239923 | -1.519616 | H | 1.716929  | 2.521757  | 1.353976  |
| C  | -2.369509 | -2.545532 | -0.756887 | H | 1.685853  | 0.831106  | 0.877060  |
| H  | -1.771374 | 0.644772  | -1.929423 | H | -3.182102 | -0.576176 | -0.293192 |
| H  | -1.195626 | -4.292226 | -1.305646 | H | 0.189033  | -3.092313 | -3.016313 |
| H  | -1.185830 | 1.911629  | 3.294990  | O | 1.079191  | -2.839331 | 0.289935  |
| H  | -1.022517 | 0.218268  | 5.158487  | C | 1.989597  | -1.992642 | 0.018758  |
| H  | -0.499872 | -2.175155 | 4.536057  | O | 1.590873  | -0.952419 | -0.588271 |
| H  | -0.171152 | -2.740274 | 2.138652  | H | 2.311961  | 1.514047  | -1.483667 |
| N  | -0.529572 | -0.821377 | 1.446931  | C | 3.410767  | -2.203985 | 0.376970  |
| C  | -2.136607 | 1.923637  | 0.313480  | H | 3.828659  | -1.270200 | 0.781851  |
| C  | 0.120265  | 2.030595  | 0.055643  | H | 3.511951  | -3.037442 | 1.081415  |
| C  | -1.853619 | 2.828065  | -0.739954 | H | 3.971000  | -2.440485 | -0.541189 |
| C  | -3.437463 | 1.650515  | 0.743081  | C | 3.936587  | 1.699306  | -0.158998 |
| C  | -0.424343 | 2.874591  | -0.877336 | O | 4.177246  | 0.907796  | 0.721363  |
| C  | -2.924511 | 3.457983  | -1.394402 | O | 4.872597  | 2.292931  | -0.888176 |

|                                                 |           |           |           |   |           |           |           |
|-------------------------------------------------|-----------|-----------|-----------|---|-----------|-----------|-----------|
| C                                               | 6.219977  | 1.942280  | -0.600682 | H | -3.074447 | 1.892867  | -1.174224 |
| H                                               | 6.463768  | 2.166574  | 0.447381  | H | 2.392380  | -0.979814 | 3.035424  |
| H                                               | 6.389278  | 0.870411  | -0.778971 | H | 0.860771  | -0.394551 | 4.942453  |
| H                                               | 6.842293  | 2.541409  | -1.274077 | H | -1.586013 | -0.011732 | 4.430996  |
| H                                               | 2.577899  | 3.162857  | -0.908283 | H | -2.345212 | -0.175763 | 2.062108  |
| H                                               | -0.038723 | -0.607305 | -3.247573 | N | -0.461741 | -0.567534 | 1.300758  |
| H                                               | -2.943463 | -3.067121 | 0.010147  | C | 2.881864  | -0.491137 | 0.222947  |
|                                                 |           |           |           | C | 1.557474  | -2.242271 | -0.332325 |
| Intermediate A <sup>t</sup> -Bubenzene          |           |           |           | C | 3.489312  | -1.187283 | -0.850838 |
| E(SMD/def2-QZVP*) = -1322.908834 E <sub>h</sub> |           |           |           | C | 3.434549  | 0.669449  | 0.771898  |
| ΔΔG(353) = 0.398323 E <sub>h</sub>              |           |           |           | C | 2.632726  | -2.299337 | -1.169383 |
| Lowest frequency = 22.09 cm <sup>-1</sup>       |           |           |           | C | 4.695915  | -0.702841 | -1.379129 |
| C                                               | 0.834918  | -0.820055 | 1.569199  | C | 4.629175  | 1.124971  | 0.225817  |
| C                                               | -1.296882 | -0.317362 | 2.328037  | H | 2.958593  | 1.199632  | 1.599395  |
| C                                               | -0.866836 | -0.236203 | 3.642339  | H | 2.806484  | -3.062701 | -1.924765 |
| C                                               | 0.483098  | -0.445030 | 3.918904  | C | 5.253108  | 0.446136  | -0.836012 |
| C                                               | 1.337645  | -0.755881 | 2.871102  | H | 5.185931  | -1.223386 | -2.204757 |
| Ru                                              | -1.223673 | -0.278056 | -0.665643 | H | 5.093799  | 2.025103  | 0.633858  |
| C                                               | 0.278332  | 1.231108  | -1.161254 | H | 6.192732  | 0.832098  | -1.236315 |
| C                                               | 0.316478  | 0.212800  | -2.132239 | N | 1.689516  | -1.145551 | 0.517435  |
| C                                               | -0.884600 | -0.168230 | -2.796802 | O | -2.994029 | -1.082561 | 0.148315  |
| C                                               | -2.093980 | 0.486281  | -2.496873 | C | -2.608269 | -2.273565 | -0.069457 |
| C                                               | -2.109795 | 1.491031  | -1.485964 | O | -1.493669 | -2.391203 | -0.658087 |
| C                                               | -0.932677 | 1.905811  | -0.809048 | C | -3.396565 | -3.449226 | 0.380337  |
| H                                               | 1.243059  | -0.337073 | -2.304467 | H | -3.179671 | -4.320061 | -0.250106 |

|                                                     |           |           |           |    |           |           |           |
|-----------------------------------------------------|-----------|-----------|-----------|----|-----------|-----------|-----------|
| H                                                   | -3.107157 | -3.691362 | 1.415265  | C  | -1.231163 | 0.312804  | 2.492654  |
| H                                                   | -4.468638 | -3.216362 | 0.371704  | C  | -0.746898 | 0.311717  | 3.790747  |
| H                                                   | 0.686586  | -2.889058 | -0.252838 | C  | 0.514400  | -0.234375 | 4.033204  |
| H                                                   | 1.194797  | 1.437865  | -0.607794 | C  | 1.237041  | -0.776581 | 2.979519  |
| H                                                   | -3.030573 | 0.148477  | -2.942896 | Ru | -1.242738 | -0.003224 | -0.517048 |
| C                                                   | -0.955011 | 3.048297  | 0.201740  | C  | 0.189705  | 1.091330  | -1.788001 |
| C                                                   | -0.783024 | 4.339036  | -0.616882 | C  | -0.667947 | 0.273765  | -2.572221 |
| H                                                   | -1.600105 | 4.465455  | -1.343094 | C  | -2.075703 | 0.376659  | -2.491641 |
| H                                                   | -0.785122 | 5.212913  | 0.051985  | C  | -2.621659 | 1.261514  | -1.532438 |
| H                                                   | 0.167905  | 4.338392  | -1.171042 | C  | -1.772062 | 2.044909  | -0.704799 |
| C                                                   | 0.192053  | 2.940504  | 1.210418  | C  | -0.345771 | 2.009563  | -0.851524 |
| H                                                   | 0.124446  | 3.771774  | 1.926659  | H  | -0.228206 | -0.503888 | -3.198683 |
| H                                                   | 0.148363  | 2.003368  | 1.784208  | H  | -2.224821 | 2.660437  | 0.071863  |
| H                                                   | 1.179674  | 3.013028  | 0.732500  | H  | 2.190579  | -1.279690 | 3.137780  |
| C                                                   | -2.282185 | 3.098715  | 0.963365  | H  | 0.918827  | -0.269148 | 5.047116  |
| H                                                   | -3.135549 | 3.332113  | 0.310620  | H  | -1.356761 | 0.720248  | 4.597155  |
| H                                                   | -2.491182 | 2.149206  | 1.477887  | H  | -2.224694 | 0.688576  | 2.244381  |
| H                                                   | -2.240734 | 3.892563  | 1.722781  | N  | -0.509656 | -0.156104 | 1.462902  |
| H                                                   | -0.883293 | -1.031111 | -3.465815 | C  | 2.636386  | -1.165568 | 0.187368  |
| Transition state <b>TS1</b> <sup>t</sup> -Bubenzene |           |           |           | C  | 0.568658  | -1.849934 | -0.445536 |
| E(SMD/def2-QZVP*) = -1322.888185 E <sub>h</sub>     |           |           |           | C  | 2.724945  | -1.719121 | -1.118391 |
| $\Delta\Delta G(353) = 0.397227 E_h$                |           |           |           | C  | 3.745131  | -0.600584 | 0.825080  |
| Lowest frequency = -120.90 cm <sup>-1</sup>         |           |           |           | C  | 1.412336  | -2.153636 | -1.485180 |
| C                                                   | 0.689749  | -0.721450 | 1.696297  | C  | 3.965714  | -1.736223 | -1.779753 |
|                                                     |           |           |           | C  | 4.953742  | -0.625872 | 0.142831  |

|   |           |           |           |
|---|-----------|-----------|-----------|
| H | 3.679414  | -0.149494 | 1.815534  |
| H | 1.125004  | -2.684464 | -2.390954 |
| C | 5.067285  | -1.191962 | -1.142112 |
| H | 4.053020  | -2.170555 | -2.777859 |
| H | 5.839574  | -0.198808 | 0.617770  |
| H | 6.039809  | -1.197835 | -1.638089 |
| N | 1.310835  | -1.268118 | 0.585989  |
| O | -2.897428 | -0.793022 | 0.426176  |
| C | -3.087997 | -2.001340 | 0.006916  |
| O | -2.313550 | -2.523717 | -0.797101 |
| C | -4.308586 | -2.698933 | 0.530229  |
| H | -4.210558 | -3.781873 | 0.391933  |
| H | -4.479571 | -2.453578 | 1.586389  |
| H | -5.185805 | -2.351281 | -0.037034 |
| H | -0.449724 | -2.239333 | -0.282412 |
| H | 1.266925  | 0.942233  | -1.860907 |
| H | -3.695689 | 1.255380  | -1.337057 |
| C | 0.553727  | 2.972613  | -0.084343 |
| C | 0.852875  | 4.100766  | -1.090763 |
| H | -0.071972 | 4.574157  | -1.453553 |
| H | 1.462135  | 4.877140  | -0.604104 |
| H | 1.410148  | 3.726166  | -1.962185 |
| C | 1.865815  | 2.326385  | 0.359521  |
| H | 2.514126  | 3.093480  | 0.806838  |
| H | 1.692513  | 1.555883  | 1.122062  |

|   |           |           |           |
|---|-----------|-----------|-----------|
| H | 2.431036  | 1.872453  | -0.465676 |
| H | -2.714466 | -0.306840 | -3.051105 |
| C | -0.139128 | 3.569833  | 1.142057  |
| H | -1.011458 | 4.184246  | 0.875839  |
| H | -0.457142 | 2.793457  | 1.853380  |
| H | 0.564222  | 4.230574  | 1.668545  |

Intermediate **B<sup>t</sup>-Bubenzene**

E(SMD/def2-QZVP\*) = -1322.893220 E<sub>h</sub>

$\Delta\Delta G(353) = 0.395954$  E<sub>h</sub>

Lowest frequency = 20.33 cm<sup>-1</sup>

|    |           |           |           |
|----|-----------|-----------|-----------|
| C  | 0.640233  | -0.657360 | 1.863584  |
| C  | -1.030843 | 0.768277  | 2.600602  |
| C  | -0.526076 | 0.753973  | 3.893378  |
| C  | 0.616549  | 0.000074  | 4.158109  |
| C  | 1.203161  | -0.736093 | 3.134197  |
| Ru | -1.126695 | 0.117366  | -0.384505 |
| C  | 0.091789  | 1.038218  | -1.951129 |
| C  | -0.978042 | 0.295881  | -2.542884 |
| C  | -2.309477 | 0.530334  | -2.168197 |
| C  | -2.577304 | 1.499672  | -1.158414 |
| C  | -1.516034 | 2.225263  | -0.572005 |
| C  | -0.152183 | 2.034796  | -0.982126 |
| H  | -0.756334 | -0.519212 | -3.232624 |
| H  | -1.744547 | 2.913697  | 0.241441  |



|    |           |           |           |   |           |           |           |
|----|-----------|-----------|-----------|---|-----------|-----------|-----------|
| C  | -0.350308 | -1.648899 | 3.717896  | C | 3.949513  | 1.285621  | -1.877914 |
| C  | 1.014314  | -1.374600 | 3.834266  | C | 5.128572  | 1.087304  | 0.230619  |
| C  | 1.701022  | -0.819173 | 2.767342  | H | 4.049547  | 0.378575  | 1.939876  |
| Ru | -1.217507 | -0.427039 | -0.349723 | H | 1.094367  | 0.772054  | -2.733333 |
| C  | -2.053944 | 1.593226  | -0.287275 | C | 5.112021  | 1.421039  | -1.130156 |
| C  | -1.862718 | 1.183220  | -1.642258 | H | 3.929873  | 1.555210  | -2.935958 |
| C  | -2.412879 | -0.017853 | -2.145076 | H | 6.049021  | 1.212849  | 0.804393  |
| C  | -3.214216 | -0.832928 | -1.294246 | H | 6.021676  | 1.797294  | -1.602375 |
| C  | -3.460387 | -0.454736 | 0.033427  | N | 1.538771  | 0.010940  | 0.447296  |
| C  | -2.819958 | 0.714012  | 0.533412  | O | -0.732466 | -2.472975 | -0.684348 |
| C  | -1.524418 | 2.912734  | 0.271982  | C | 0.160417  | -3.062369 | -1.304015 |
| H  | -1.212487 | 1.770736  | -2.289476 | O | 1.146425  | -2.467314 | -1.899838 |
| H  | -2.200844 | -0.330934 | -3.168050 | H | 1.116565  | -1.482075 | -1.747573 |
| H  | -4.055949 | -1.089051 | 0.691378  | C | 0.169101  | -4.547352 | -1.412259 |
| H  | -2.916780 | 0.945952  | 1.596373  | H | 0.221419  | -4.836796 | -2.471789 |
| H  | 2.766801  | -0.626640 | 2.837191  | H | 1.078484  | -4.936300 | -0.930162 |
| H  | 1.548626  | -1.603752 | 4.758759  | H | -0.720970 | -4.974084 | -0.939489 |
| H  | -0.919746 | -2.093214 | 4.534342  | C | -0.761876 | 2.687295  | 1.581702  |
| H  | -2.028910 | -1.564952 | 2.356699  | H | -0.464872 | 3.656863  | 2.007113  |
| N  | -0.320321 | -0.798483 | 1.484790  | H | -1.364076 | 2.171457  | 2.344223  |
| C  | 2.829218  | 0.452003  | 0.122686  | H | 0.151274  | 2.101619  | 1.405871  |
| C  | 0.692712  | 0.110781  | -0.677584 | C | -2.748256 | 3.807252  | 0.526072  |
| C  | 2.796525  | 0.802186  | -1.250795 | H | -2.424866 | 4.793090  | 0.892288  |
| C  | 3.994179  | 0.602797  | 0.876908  | H | -3.327842 | 3.962953  | -0.396562 |
| C  | 1.451642  | 0.577989  | -1.722861 | H | -3.421963 | 3.373997  | 1.281158  |



|                                                 |           |           |           |   |           |           |           |
|-------------------------------------------------|-----------|-----------|-----------|---|-----------|-----------|-----------|
| C                                               | -0.590689 | 3.610869  | -0.717584 | H | -0.280482 | 2.876393  | 3.932328  |
| H                                               | -0.219051 | 4.544568  | -0.271578 | H | 2.115780  | 2.193168  | 3.494594  |
| H                                               | 0.282227  | 2.987458  | -0.962150 | H | 2.595730  | 0.842692  | 1.452059  |
| H                                               | -1.106522 | 3.883931  | -1.650705 | N | 0.616626  | 0.732676  | 0.858389  |
| H                                               | -3.579362 | -1.794866 | -1.660469 | C | -2.922029 | 0.698361  | -0.028140 |
| <b>Intermediate D<sup>f</sup>-Bubenzene</b>     |           |           |           | C | -0.976678 | -0.136666 | -0.926302 |
| E(SMD/def2-QZVP*) = -1400.235611 E <sub>h</sub> |           |           |           | C | -3.226240 | -0.009439 | -1.217933 |
| $\Delta\Delta G(353) = 0.430170 E_h$            |           |           |           | C | -3.923437 | 1.300349  | 0.733062  |
| Lowest frequency = 16.98 cm <sup>-1</sup>       |           |           |           | C | -1.987342 | -0.515165 | -1.758101 |
| C                                               | -0.671920 | 1.094069  | 1.071594  | C | -4.553322 | -0.108100 | -1.647185 |
| C                                               | 1.577472  | 1.136848  | 1.707510  | C | -5.237862 | 1.187149  | 0.285115  |
| C                                               | 1.306452  | 1.895409  | 2.828092  | H | -3.727933 | 1.848572  | 1.651901  |
| C                                               | -0.021790 | 2.268631  | 3.062644  | H | -1.881164 | -1.086114 | -2.678602 |
| C                                               | -1.014612 | 1.876270  | 2.185248  | C | -5.551577 | 0.493473  | -0.890096 |
| Ru                                              | 1.001388  | -0.474749 | -0.767413 | H | -4.797014 | -0.648708 | -2.564263 |
| C                                               | 0.435500  | -2.649376 | -0.937905 | H | -6.035889 | 1.652975  | 0.866605  |
| C                                               | 1.209147  | -2.282247 | -2.057615 | H | -6.592466 | 0.426850  | -1.213152 |
| C                                               | 2.485476  | -1.697006 | -1.860205 | N | -1.529300 | 0.612803  | 0.131427  |
| C                                               | 3.025849  | -1.581599 | -0.552740 | C | 1.900162  | 1.327583  | -1.661983 |
| C                                               | 2.211991  | -1.900867 | 0.541994  | H | 2.961619  | 1.128793  | -1.833727 |
| C                                               | 0.886220  | -2.427386 | 0.389919  | C | 0.916347  | 0.834177  | -2.525027 |
| H                                               | 0.810612  | -2.410517 | -3.065165 | H | 1.188726  | 0.248690  | -3.406199 |
| H                                               | 2.593730  | -1.720966 | 1.548047  | H | -0.031868 | 1.370303  | -2.587116 |
| H                                               | -2.044870 | 2.175375  | 2.346081  | C | 1.620227  | 2.591128  | -0.921871 |
|                                                 |           |           |           | O | 0.541792  | 3.119407  | -0.836459 |

|                                                   |           |           |           |                                             |           |           |           |
|---------------------------------------------------|-----------|-----------|-----------|---------------------------------------------|-----------|-----------|-----------|
| O                                                 | 2.733648  | 3.071212  | -0.366406 | Lowest frequency = -293.65 cm <sup>-1</sup> |           |           |           |
| H                                                 | -0.571684 | -3.032361 | -1.101952 | C                                           | 0.395343  | -1.444878 | 0.940635  |
| H                                                 | 4.027995  | -1.176924 | -0.399967 | C                                           | -1.667475 | -0.848428 | 1.837984  |
| C                                                 | 0.068977  | -2.903090 | 1.590129  | C                                           | -1.555037 | -1.777428 | 2.853980  |
| C                                                 | 0.450498  | -4.379368 | 1.797934  | C                                           | -0.422795 | -2.595085 | 2.877244  |
| H                                                 | 1.525985  | -4.494317 | 2.003200  | C                                           | 0.556008  | -2.440419 | 1.910907  |
| H                                                 | -0.103372 | -4.792583 | 2.654222  | Ru                                          | -0.861871 | 0.695423  | -0.636380 |
| H                                                 | 0.205943  | -4.986145 | 0.912820  | C                                           | 0.236342  | 2.589192  | -0.953491 |
| C                                                 | -1.436536 | -2.794994 | 1.329544  | C                                           | -0.750245 | 2.458577  | -1.968916 |
| H                                                 | -1.741245 | -1.763570 | 1.103768  | C                                           | -2.097176 | 2.245083  | -1.609776 |
| H                                                 | -1.773836 | -3.438917 | 0.504880  | C                                           | -2.469747 | 2.187568  | -0.240450 |
| H                                                 | -1.982390 | -3.122390 | 2.225744  | C                                           | -1.459885 | 2.296958  | 0.740633  |
| C                                                 | 2.604154  | 4.314169  | 0.312938  | C                                           | -0.084968 | 2.537345  | 0.424203  |
| H                                                 | 3.607442  | 4.577608  | 0.664763  | H                                           | -0.458354 | 2.476564  | -3.020273 |
| H                                                 | 2.221022  | 5.087143  | -0.367692 | H                                           | -1.740839 | 2.156938  | 1.785184  |
| H                                                 | 1.909907  | 4.218388  | 1.160657  | H                                           | 1.416086  | -3.103632 | 1.875349  |
| C                                                 | 0.399100  | -2.114874 | 2.860585  | H                                           | -0.314060 | -3.369935 | 3.638909  |
| H                                                 | 1.448284  | -2.224825 | 3.172381  | H                                           | -2.349123 | -1.875610 | 3.594372  |
| H                                                 | 0.174971  | -1.044743 | 2.750088  | H                                           | -2.554080 | -0.221506 | 1.733744  |
| H                                                 | -0.213384 | -2.497310 | 3.689300  | N                                           | -0.712403 | -0.672489 | 0.910358  |
| H                                                 | 3.068623  | -1.365560 | -2.722467 | C                                           | 2.659876  | -1.414974 | -0.175124 |
| Transition state <b>TS3<sup>f</sup>-Bubenzene</b> |           |           |           | C                                           | 0.867683  | -0.345667 | -1.129853 |
| E(SMD/def2-QZVP*) = -1400.216070 E <sub>h</sub>   |           |           |           | C                                           | 3.093902  | -0.761967 | -1.359538 |
| ΔΔG(353) = 0.428204 E <sub>h</sub>                |           |           |           | C                                           | 3.559792  | -2.082980 | 0.656670  |
|                                                   |           |           |           | C                                           | 1.959142  | -0.108727 | -1.935057 |



|   |           |           |           |   |           |           |           |
|---|-----------|-----------|-----------|---|-----------|-----------|-----------|
| C | -0.976389 | 1.950542  | -2.180475 | C | -2.044148 | -0.910848 | -1.434993 |
| C | -1.689209 | 2.149708  | -0.964091 | H | -2.336107 | -0.578117 | -2.438402 |
| C | -0.973445 | 2.242689  | 0.250782  | C | -1.261405 | -2.212350 | -1.418110 |
| C | 0.464759  | 2.209944  | 0.306311  | H | -1.374737 | -2.816074 | -2.331707 |
| H | 0.977664  | 1.601142  | -3.038666 | H | -1.577225 | -2.832710 | -0.568086 |
| H | -1.540795 | 2.352237  | 1.174511  | C | -3.209218 | -0.868486 | -0.522392 |
| H | 1.054453  | -3.528767 | 2.210835  | O | -3.373642 | -1.577671 | 0.445299  |
| H | -0.250485 | -2.894576 | 4.277005  | O | -4.086911 | 0.090741  | -0.864057 |
| H | -1.841686 | -0.948589 | 4.131035  | H | 2.225003  | 1.844773  | -0.905889 |
| H | -2.014500 | 0.301479  | 1.990092  | H | -2.779727 | 2.156531  | -0.961655 |
| N | -0.550110 | -0.801814 | 1.029064  | C | 1.252129  | 2.453939  | 1.593317  |
| C | 2.253896  | -1.706159 | -0.328675 | C | 2.041608  | 3.758217  | 1.385217  |
| C | 0.167236  | -1.778482 | -1.240397 | H | 1.371311  | 4.599204  | 1.151360  |
| C | 2.320690  | -1.084538 | -1.592886 | H | 2.594004  | 4.010582  | 2.302799  |
| C | 3.360720  | -1.797610 | 0.507553  | H | 2.771521  | 3.667077  | 0.567538  |
| C | 0.979546  | -1.107576 | -2.143047 | C | 2.222343  | 1.299420  | 1.860847  |
| C | 3.538693  | -0.578627 | -2.057960 | H | 1.680739  | 0.363552  | 2.058561  |
| C | 4.562458  | -1.275973 | 0.033770  | H | 2.906435  | 1.119395  | 1.019719  |
| H | 3.299326  | -2.263802 | 1.492098  | H | 2.837821  | 1.527388  | 2.743608  |
| H | 0.705875  | -0.894062 | -3.175109 | C | -5.247811 | 0.189479  | -0.052532 |
| C | 4.654728  | -0.680248 | -1.233675 | H | -5.875646 | 0.965434  | -0.505030 |
| H | 3.613992  | -0.118734 | -3.046128 | H | -5.787137 | -0.767733 | -0.025315 |
| H | 5.455330  | -1.344074 | 0.658829  | H | -4.986980 | 0.466536  | 0.980196  |
| H | 5.618592  | -0.299681 | -1.577333 | C | 0.339771  | 2.631944  | 2.807289  |
| N | 0.931934  | -2.138551 | -0.115532 | H | -0.345372 | 3.485111  | 2.690247  |

H -0.251011 1.729213 3.018886  
 H 0.954321 2.831205 3.696905  
 H -1.508750 1.829725 -3.124706

Intermediate **F<sup>M</sup>-Bubenzene**

E(SMD/def2-QZVP\*) = -1629.196825 E<sub>h</sub>

ΔΔG(353) = 0.489014 E<sub>h</sub>

Lowest frequency = 23.99 cm<sup>-1</sup>

C -1.742208 0.146503 1.635824  
 C 0.271487 -0.493546 2.574460  
 C -0.300203 -0.681019 3.820158  
 C -1.663282 -0.428810 3.973444  
 C -2.385850 -0.007065 2.869240  
 Ru 0.567549 -0.263140 -0.403151  
 C 0.384851 -2.528209 -0.458067  
 C -0.785345 -1.855974 -0.924706  
 C -0.730106 -0.927820 -1.987300  
 C 0.548157 -0.611592 -2.535298  
 C 1.710635 -1.194040 -1.999612  
 C 1.651352 -2.199005 -0.970119  
 H -1.748995 -2.054731 -0.449904  
 H 2.674068 -0.832614 -2.354882  
 H -3.448999 0.227225 2.933542  
 H -2.152208 -0.547282 4.942735  
 H 0.318301 -1.020701 4.651751

H 1.328186 -0.703117 2.410196  
 N -0.420901 -0.089236 1.489841  
 C -3.671867 -0.088451 0.118169  
 C -2.246231 1.637371 -0.285832  
 C -4.170476 0.653159 -0.979533  
 C -4.298376 -1.246544 0.583687  
 C -3.255511 1.739635 -1.201681  
 C -5.346363 0.225424 -1.612420  
 C -5.461270 -1.648283 -0.065726  
 H -3.902425 -1.821787 1.423326  
 H -3.341005 2.522805 -1.952361  
 C -5.981293 -0.918629 -1.147858  
 H -5.751984 0.782968 -2.459389  
 H -5.978885 -2.547524 0.274658  
 H -6.898217 -1.261773 -1.631254  
 N -2.485927 0.523504 0.523978  
 C 0.143160 1.785457 -0.895930  
 C -1.011469 2.448437 -0.137465  
 H -1.202666 3.453573 -0.540793  
 H -0.790751 2.610874 0.934364  
 H 0.292385 -3.243426 0.359869  
 H 0.650244 0.157383 -3.302799  
 C 2.909425 -2.898084 -0.459767  
 C 2.885040 -4.316243 -1.055751  
 H 2.846902 -4.286717 -2.155177

H 3.795665 -4.860908 -0.763596  
 H 2.016248 -4.890717 -0.700811  
 C 2.919701 -2.980535 1.070004  
 H 2.967559 -1.974074 1.509943  
 H 2.040407 -3.501516 1.475556  
 H 3.806448 -3.539235 1.403303  
 O 2.377851 0.309641 0.569017  
 C 2.736975 1.281291 1.230154  
 O 1.893986 2.165342 1.702451  
 H 0.998590 1.960215 1.373238  
 C 4.165973 1.547404 1.525882  
 H 4.572497 2.085025 0.653307  
 H 4.283780 2.175112 2.416692  
 H 4.714980 0.603437 1.623747  
 C 1.366935 2.635891 -1.060280  
 O 2.397798 2.274791 -1.582647  
 O 1.204995 3.872308 -0.573648  
 C 2.309503 4.755776 -0.687735  
 H 2.685242 4.782818 -1.719586  
 H 1.947187 5.743608 -0.382238  
 H 3.126261 4.437480 -0.022208  
 H -0.214507 1.680449 -1.932491  
 C 4.183611 -2.184497 -0.917138  
 H 4.304548 -2.212435 -2.009982  
 H 4.196489 -1.135086 -0.589476

H 5.059423 -2.690330 -0.485462  
 H -1.637917 -0.425351 -2.326127

Transition state **TS4<sup>t</sup>-Bubenzene**

E(SMD/def2-QZVP\*) = -1629.175555 E<sub>h</sub>

$\Delta\Delta G(353) = 0.484630 E_h$

Lowest frequency = -1175.27 cm<sup>-1</sup>

C -1.711688 0.028889 1.668362  
 C 0.240309 -0.779396 2.607638  
 C -0.355786 -0.932883 3.848614  
 C -1.691616 -0.570372 3.999695  
 C -2.372128 -0.082175 2.893442  
 Ru 0.628750 -0.299450 -0.324155  
 C 0.517534 -2.461518 -0.624057  
 C -0.695124 -1.850712 -1.063351  
 C -0.674506 -0.815216 -2.013959  
 C 0.589726 -0.368253 -2.499881  
 C 1.788638 -0.952698 -2.053997  
 C 1.774848 -2.037514 -1.117154  
 H -1.648533 -2.147948 -0.620838  
 H 2.731593 -0.514926 -2.375983  
 H -3.417390 0.224657 2.947605  
 H -2.194453 -0.660689 4.964886  
 H 0.228453 -1.329645 4.679837  
 H 1.283890 -1.048799 2.447038

|   |           |           |           |   |           |           |           |
|---|-----------|-----------|-----------|---|-----------|-----------|-----------|
| N | -0.414130 | -0.309902 | 1.530571  | H | 2.274814  | -4.696640 | -1.263712 |
| C | -3.535985 | -0.251419 | 0.051976  | C | 3.048043  | -3.060409 | 0.818820  |
| C | -2.303164 | 1.646676  | -0.153021 | H | 3.006946  | -2.139419 | 1.416245  |
| C | -4.081585 | 0.517693  | -1.003773 | H | 2.212960  | -3.715739 | 1.106171  |
| C | -4.056163 | -1.494067 | 0.422097  | H | 3.973057  | -3.594964 | 1.078597  |
| C | -3.287033 | 1.710510  | -1.102519 | O | 2.344548  | 0.110695  | 0.773972  |
| C | -5.187928 | 0.016731  | -1.706821 | C | 2.441302  | 1.160197  | 1.479253  |
| C | -5.151394 | -1.964776 | -0.294411 | O | 1.484553  | 1.965369  | 1.583283  |
| H | -3.632488 | -2.074554 | 1.244991  | H | 0.763737  | 1.652551  | 0.555648  |
| H | -3.434174 | 2.538700  | -1.793038 | C | 3.736703  | 1.439591  | 2.165017  |
| C | -5.710084 | -1.217891 | -1.346307 | H | 4.344896  | 2.055293  | 1.483198  |
| H | -5.629562 | 0.591011  | -2.524140 | H | 3.568972  | 2.014899  | 3.083426  |
| H | -5.587559 | -2.930590 | -0.030807 | H | 4.285101  | 0.512557  | 2.369518  |
| H | -6.571527 | -1.617869 | -1.884911 | C | 1.199487  | 2.956259  | -0.946709 |
| N | -2.436081 | 0.443838  | 0.546795  | O | 2.213914  | 2.589935  | -1.491346 |
| C | 0.096844  | 2.003858  | -0.565129 | O | 0.940654  | 4.214509  | -0.622080 |
| C | -1.165734 | 2.570530  | 0.092779  | C | 1.954539  | 5.166994  | -0.920511 |
| H | -1.406922 | 3.548604  | -0.345134 | H | 2.180589  | 5.169156  | -1.995865 |
| H | -1.007729 | 2.743453  | 1.170228  | H | 1.560944  | 6.140196  | -0.608393 |
| H | 0.470919  | -3.231882 | 0.145683  | H | 2.874304  | 4.931057  | -0.366476 |
| H | 0.649990  | 0.496496  | -3.164401 | H | -0.207432 | 1.590247  | -1.530074 |
| C | 3.060485  | -2.728526 | -0.676289 | C | 4.297450  | -1.880733 | -0.982338 |
| C | 3.119725  | -4.030709 | -1.495935 | H | 4.448164  | -1.741580 | -2.062951 |
| H | 3.107272  | -3.826662 | -2.577331 | H | 4.233980  | -0.895050 | -0.500741 |
| H | 4.050971  | -4.569610 | -1.265164 | H | 5.191695  | -2.394194 | -0.600927 |

|                                                 |           |           |           |   |           |           |           |
|-------------------------------------------------|-----------|-----------|-----------|---|-----------|-----------|-----------|
| H                                               | -1.602629 | -0.315883 | -2.300729 | C | -3.491409 | -0.180297 | 0.085454  |
|                                                 |           |           |           | C | -2.287213 | 1.628195  | -0.573787 |
| Intermediate $G^{\ddagger}$ -Bubenzene          |           |           |           | C | -4.040272 | 0.294556  | -1.130273 |
| E(SMD/def2-QZVP*) = -1629.194335 E <sub>h</sub> |           |           |           | C | -4.005067 | -1.292044 | 0.758836  |
| $\Delta\Delta G(353) = 0.486437 E_h$            |           |           |           | C | -3.262993 | 1.438086  | -1.516477 |
| Lowest frequency = 12.91 cm <sup>-1</sup>       |           |           |           | C | -5.136842 | -0.381400 | -1.689303 |
| C                                               | -1.678340 | 0.491743  | 1.589780  | C | -5.090220 | -1.940138 | 0.179970  |
| C                                               | 0.231603  | -0.209261 | 2.690887  | H | -3.585213 | -1.633882 | 1.707940  |
| C                                               | -0.326150 | 0.055805  | 3.931859  | H | -3.420079 | 2.070512  | -2.388186 |
| C                                               | -1.612277 | 0.582412  | 3.991025  | C | -5.647347 | -1.491240 | -1.031329 |
| C                                               | -2.293575 | 0.803333  | 2.800401  | H | -5.581099 | -0.035442 | -2.625158 |
| Ru                                              | 0.570470  | -0.497016 | -0.273342 | H | -5.522542 | -2.809799 | 0.679340  |
| C                                               | 0.481178  | -2.616283 | -0.099524 | H | -6.501173 | -2.024212 | -1.454455 |
| C                                               | -0.790113 | -2.160848 | -0.566809 | N | -2.406315 | 0.629792  | 0.398045  |
| C                                               | -0.878453 | -1.354731 | -1.712279 | C | 0.105404  | 2.043098  | -1.060339 |
| C                                               | 0.327434  | -0.993845 | -2.371926 | C | -1.195083 | 2.638374  | -0.540436 |
| C                                               | 1.585503  | -1.473236 | -1.945171 | H | -1.483239 | 3.488749  | -1.173107 |
| C                                               | 1.686215  | -2.317639 | -0.801004 | H | -1.032109 | 3.036208  | 0.473067  |
| H                                               | -1.691667 | -2.363104 | 0.015211  | H | 0.527895  | -3.178562 | 0.832936  |
| H                                               | 2.483664  | -1.113771 | -2.443961 | H | 0.294930  | -0.278838 | -3.197331 |
| H                                               | -3.304090 | 1.213209  | 2.779178  | C | 3.023345  | -2.870786 | -0.329763 |
| H                                               | -2.078928 | 0.821600  | 4.948941  | C | 3.083822  | -4.297604 | -0.907294 |
| H                                               | 0.254190  | -0.141418 | 4.833977  | H | 3.013482  | -4.292910 | -2.005536 |
| H                                               | 1.244584  | -0.599728 | 2.593548  | H | 4.042795  | -4.761960 | -0.632428 |
| N                                               | -0.426251 | -0.002325 | 1.539390  | H | 2.274736  | -4.931732 | -0.513719 |



|   |           |           |           |                                                 |
|---|-----------|-----------|-----------|-------------------------------------------------|
| C | 3.114013  | -2.928772 | 1.198184  |                                                 |
| H | 3.025090  | -1.920602 | 1.625278  | Intermediate <b>H<sup>†</sup>-Bubenzene</b>     |
| H | 2.355134  | -3.586099 | 1.647484  | E(SMD/def2-QZVP*) = -1629.222437 E <sub>h</sub> |
| H | 4.092942  | -3.338963 | 1.484423  | $\Delta\Delta G(353) = 0.486591 E_h$            |
| O | 2.274283  | 0.119868  | 0.636898  | Lowest frequency = 15.77 cm <sup>-1</sup>       |
| C | 2.473628  | 1.297154  | 1.173991  | C -0.213619 0.905275 1.741566                   |
| O | 1.588677  | 2.112425  | 1.384412  | C -0.499456 -1.304956 2.359413                  |
| H | 0.521093  | 1.423627  | -0.208985 | C -0.696597 -0.961223 3.688758                  |
| C | 3.919141  | 1.579044  | 1.474243  | C -0.662859 0.382169 4.047679                   |
| H | 4.383269  | 1.929392  | 0.538582  | C -0.404218 1.322117 3.058088                   |
| H | 4.000952  | 2.372855  | 2.226138  | Ru -0.366631 -1.142933 -0.632159                |
| H | 4.452736  | 0.675666  | 1.796530  | C -2.093471 0.101178 -1.130152                  |
| C | 1.292121  | 2.958117  | -1.278316 | C -1.018452 0.451808 -1.976757                  |
| O | 2.353815  | 2.549636  | -1.673852 | C -0.353737 -0.567487 -2.706026                 |
| O | 1.019132  | 4.216273  | -0.986731 | C -0.783011 -1.910108 -2.608436                 |
| C | 2.103337  | 5.135913  | -1.072072 | C -1.844845 -2.231794 -1.720216                 |
| H | 2.854387  | 4.895991  | -0.306053 | C -2.544509 -1.240354 -0.973630                 |
| H | 2.572615  | 5.090859  | -2.064247 | H -0.653608 1.479983 -1.997386                  |
| H | 1.677524  | 6.127964  | -0.888993 | H -2.067565 -3.285411 -1.546793                 |
| H | -0.056578 | 1.500014  | -1.996599 | H -0.328172 2.387528 3.279217                   |
| C | 4.197801  | -2.048642 | -0.865876 | H -0.813265 0.693551 5.083585                   |
| H | 4.108360  | -0.995153 | -0.566488 | H -0.874121 -1.747339 4.423826                  |
| H | 5.136146  | -2.448433 | -0.455786 | H -0.502553 -2.347570 2.040816                  |
| H | 4.281435  | -2.107454 | -1.961132 | N -0.290375 -0.395958 1.387999                  |
| H | -1.836335 | -0.928143 | -2.017106 | C -0.873318 2.804344 0.312661                   |

|   |           |           |           |   |           |           |           |
|---|-----------|-----------|-----------|---|-----------|-----------|-----------|
| C | 1.276546  | 2.084506  | 0.125071  | H | -3.073023 | -0.424700 | 1.643841  |
| C | -0.231324 | 3.581780  | -0.682421 | H | -4.228810 | 0.432175  | 0.584741  |
| C | -2.205261 | 3.006185  | 0.682676  | H | -4.794050 | -0.862397 | 1.644541  |
| C | 1.121932  | 3.107217  | -0.774506 | O | 0.502943  | -2.871839 | 0.212635  |
| C | -0.967219 | 4.582283  | -1.337160 | C | 1.679033  | -2.428343 | 0.015052  |
| C | -2.905739 | 4.007965  | 0.019182  | O | 1.741688  | -1.304022 | -0.566694 |
| H | -2.677340 | 2.415712  | 1.471305  | H | 3.174916  | 0.844632  | -1.387239 |
| H | 1.911306  | 3.521130  | -1.397995 | C | 2.894200  | -3.169087 | 0.428787  |
| C | -2.294422 | 4.782742  | -0.982723 | H | 3.608372  | -2.466877 | 0.883480  |
| H | -0.498667 | 5.197346  | -2.108598 | H | 2.636477  | -3.988851 | 1.109016  |
| H | -3.945744 | 4.203033  | 0.289379  | H | 3.372723  | -3.587214 | -0.470565 |
| H | -2.873960 | 5.562489  | -1.481019 | C | 4.694000  | 0.347722  | -0.018765 |
| N | 0.049121  | 1.867861  | 0.759829  | O | 4.606038  | -0.460849 | 0.873791  |
| C | 3.587350  | 1.270286  | -0.457515 | O | 5.785468  | 0.511802  | -0.756680 |
| C | 2.500074  | 1.377922  | 0.592685  | C | 6.886129  | -0.336564 | -0.459669 |
| H | 2.892638  | 1.907250  | 1.479860  | H | 7.196029  | -0.218300 | 0.588288  |
| H | 2.256432  | 0.364814  | 0.933325  | H | 6.622328  | -1.390501 | -0.630807 |
| H | -2.520601 | 0.890178  | -0.511729 | H | 7.695565  | -0.035365 | -1.133410 |
| H | -0.230814 | -2.705980 | -3.110076 | H | 4.023263  | 2.243775  | -0.726049 |
| C | -3.730436 | -1.601444 | -0.085466 | C | -3.532132 | -2.966108 | 0.580871  |
| C | -4.960817 | -1.651609 | -1.005837 | H | -3.501265 | -3.791197 | -0.144979 |
| H | -4.842865 | -2.412336 | -1.792412 | H | -2.606063 | -2.996427 | 1.173560  |
| H | -5.859481 | -1.904275 | -0.423012 | H | -4.374703 | -3.172336 | 1.256314  |
| H | -5.134494 | -0.680993 | -1.494746 | H | 0.552065  | -0.327208 | -3.266402 |
| C | -3.958741 | -0.548644 | 1.002447  |   |           |           |           |

***p*-cymene**E(SMD/def2-QZVP\*) = -389.215198 E<sub>h</sub> $\Delta\Delta G(353) = 0.166011 E_h$ Lowest frequency = 16.58 cm<sup>-1</sup>

|   |           |           |           |
|---|-----------|-----------|-----------|
| C | -1.600312 | -1.198595 | 0.000014  |
| C | -2.200051 | 0.062573  | 0.000039  |
| C | -1.356630 | 1.181970  | 0.000060  |
| C | 0.026381  | 1.042771  | 0.000040  |
| C | 0.628296  | -0.222973 | 0.000005  |
| C | -0.212377 | -1.337511 | -0.000007 |
| H | -2.230566 | -2.092538 | 0.000018  |
| H | -1.795719 | 2.184133  | 0.000100  |
| H | 0.650550  | 1.940901  | 0.000063  |
| H | 0.228153  | -2.338955 | -0.000021 |
| C | 2.134365  | -0.379194 | -0.000024 |
| H | 2.340459  | -1.463515 | -0.000059 |
| C | 2.762952  | 0.209817  | -1.262510 |
| H | 3.850355  | 0.035097  | -1.278393 |
| H | 2.329689  | -0.237467 | -2.169545 |
| H | 2.600785  | 1.298244  | -1.317518 |
| C | 2.762997  | 0.209744  | 1.262474  |
| H | 2.329774  | -0.237600 | 2.169498  |
| H | 3.850403  | 0.035036  | 1.278305  |
| H | 2.600821  | 1.298166  | 1.317556  |
| C | -3.692672 | 0.224603  | -0.000047 |

H -4.034532 0.783068 -0.886198

H -4.203394 -0.748599 0.000895

H -4.034476 0.784795 0.885025

**benzene**E(SMD/def2-QZVP\*) = -232.072172 E<sub>h</sub> $\Delta\Delta G(353) = 0.067643 E_h$ Lowest frequency = 416.11 cm<sup>-1</sup>

|   |           |           |           |
|---|-----------|-----------|-----------|
| C | 0.018893  | -1.394571 | -0.000000 |
| C | 1.217192  | -0.680925 | -0.000003 |
| C | 1.198298  | 0.713649  | 0.000002  |
| C | -0.018892 | 1.394571  | -0.000001 |
| C | -1.217192 | 0.680926  | -0.000002 |
| C | -1.198298 | -0.713648 | 0.000003  |
| H | 0.033690  | -2.487177 | -0.000001 |
| H | 2.170810  | -1.214419 | 0.000002  |
| H | 2.137118  | 1.272770  | 0.000006  |
| H | -0.033688 | 2.487174  | 0.000004  |
| H | -2.170807 | 1.214417  | -0.000006 |
| H | -2.137122 | -1.272770 | 0.000005  |

***t*-Bubenzene**E(SMD/def2-QZVP\*) = -389.210794 E<sub>h</sub> $\Delta\Delta G(353) = 0.170727 E_h$ Lowest frequency = 49.22 cm<sup>-1</sup>

|   |           |           |           |                                                |           |           |           |
|---|-----------|-----------|-----------|------------------------------------------------|-----------|-----------|-----------|
| C | -2.207105 | 1.201807  | 0.000021  | <b>Alkene 3a</b>                               |           |           |           |
| C | -0.811318 | 1.217179  | 0.000047  | E(SMD/def2-QZVP*) = -306.263685 E <sub>h</sub> |           |           |           |
| C | -0.071178 | 0.029813  | 0.000053  | $\Delta\Delta G(353) = 0.058388 E_h$           |           |           |           |
| C | -0.786734 | -1.177639 | 0.000038  | Lowest frequency = 98.57 cm <sup>-1</sup>      |           |           |           |
| C | -2.177786 | -1.199472 | 0.000009  | C                                              | -0.039118 | 0.113460  | -0.000001 |
| C | -2.898430 | -0.005321 | 0.000001  | O                                              | 0.060969  | 1.314493  | 0.000005  |
| H | -2.755331 | 2.147332  | 0.000021  | O                                              | 1.014277  | -0.714085 | 0.000034  |
| H | -0.300304 | 2.180549  | 0.000071  | C                                              | 2.284595  | -0.090371 | 0.000079  |
| H | -0.246178 | -2.127529 | 0.000039  | H                                              | 3.026256  | -0.897672 | 0.000105  |
| H | -2.703861 | -2.157462 | -0.000005 | H                                              | 2.410819  | 0.543173  | -0.890819 |
| H | -3.990894 | -0.018238 | -0.000020 | H                                              | 2.410756  | 0.543173  | 0.890986  |
| C | 1.459174  | 0.005706  | 0.000013  | C                                              | -1.311072 | -0.647737 | -0.000047 |
| C | 1.952917  | -0.729681 | 1.254479  | C                                              | -2.481310 | -0.007576 | -0.000086 |
| H | 3.054094  | -0.761141 | 1.273383  | H                                              | -1.236107 | -1.738033 | -0.000046 |
| H | 1.608476  | -0.221395 | 2.168125  | H                                              | -3.431251 | -0.546877 | -0.000120 |
| H | 1.588017  | -1.766749 | 1.290519  | H                                              | -2.501012 | 1.086327  | -0.000084 |
| C | 1.952693  | -0.729267 | -1.254788 |                                                |           |           |           |
| H | 1.608137  | -0.220620 | -2.168191 | <b>HOAc</b>                                    |           |           |           |
| H | 3.053866  | -0.760802 | -1.273881 | E(SMD/def2-QZVP*) = -228.952262 E <sub>h</sub> |           |           |           |
| H | 1.587679  | -1.766286 | -1.291142 | $\Delta\Delta G(353) = 0.029151 E_h$           |           |           |           |
| C | 2.057973  | 1.412672  | 0.000189  | Lowest frequency = 79.73 cm <sup>-1</sup>      |           |           |           |
| H | 1.759077  | 1.984535  | -0.891561 | C                                              | -0.092792 | 0.121673  | -0.000005 |
| H | 1.759182  | 1.984263  | 0.892150  | O                                              | -0.637637 | 1.192942  | -0.000033 |
| H | 3.156800  | 1.348758  | 0.000109  | O                                              | -0.776657 | -1.033953 | -0.000017 |
|   |           |           |           | H                                              | -1.715791 | -0.792741 | -0.000050 |

C 1.388081 -0.110577 0.000048  
 H 1.673345 -0.698450 0.884681  
 H 1.673400 -0.698526 -0.884515  
 H 1.911661 0.851229 0.000025

**HCl**

E(SMD/def2-QZVP\*) = -460.684264 E<sub>h</sub>

$\Delta\Delta G(353) = -0.014961 E_h$

Lowest frequency = 3018.19 cm<sup>-1</sup>

Cl 0.000000 0.000000 0.071392  
 H 0.000000 0.000000 -1.213660

**[RuCl<sub>2</sub>(*p*-cymene)]<sub>2</sub>**

E(SMD/def2-QZVP\*) = -2808.883869 E<sub>h</sub>

$\Delta\Delta G(353) = 0.357479 E_h$

Lowest frequency = 9.69 cm<sup>-1</sup>

C -3.196188 -0.881133 -1.724727  
 C -2.371988 -1.963468 -1.260467  
 C -2.269199 -2.159877 0.134134  
 C -2.946720 -1.292237 1.044799  
 C -3.760441 -0.219736 0.599562  
 C -3.875624 -0.038364 -0.819662  
 Ru -1.811333 -0.089646 -0.293817  
 Cl 0.001572 0.128449 -1.916935  
 Ru 1.809584 0.132269 -0.273456

Cl -0.004440 -0.066608 1.344309  
 C -1.560623 -2.786344 -2.207202  
 C -4.409728 0.767555 1.538076  
 C -5.859333 0.356010 1.795703  
 C 3.763883 0.127707 0.618783  
 C 3.871526 0.130798 -0.812916  
 C 3.195636 1.089471 -1.597373  
 C 2.382693 2.109581 -0.992661  
 C 2.289094 2.124351 0.416242  
 C 2.963022 1.140788 1.204020  
 C 1.572043 3.053204 -1.819882  
 C 4.407444 -0.979552 1.416745  
 C 5.867609 -0.627189 1.701042  
 Cl 1.733421 -2.245157 -0.408586  
 Cl -1.759048 2.286406 -0.143414  
 C 3.640625 -1.331765 2.683813  
 C -3.629077 0.972261 2.828988  
 H 3.195710 0.984858 -2.684214  
 H 4.373563 -0.703630 -1.307028  
 H 2.745271 1.096065 2.271915  
 H 1.573127 2.796338 0.892809  
 H 2.087522 4.024532 -1.891154  
 H 0.580044 3.198613 -1.367041  
 H 1.422809 2.659663 -2.833339  
 H 4.373735 -1.866664 0.762902

|                                                |           |           |           |   |           |           |           |
|------------------------------------------------|-----------|-----------|-----------|---|-----------|-----------|-----------|
| H                                              | 6.423475  | -0.414491 | 0.774940  | C | 1.948116  | 0.134342  | 0.046793  |
| H                                              | 6.372464  | -1.459410 | 2.214608  | C | 1.733976  | -1.254545 | 0.339047  |
| H                                              | 5.939667  | 0.262356  | 2.347470  | H | 2.096856  | -2.011710 | -0.357625 |
| H                                              | 3.683510  | -0.524377 | 3.432535  | C | 0.932686  | -1.661312 | 1.424001  |
| H                                              | 4.079562  | -2.226550 | 3.149109  | H | 0.698693  | -2.719857 | 1.552988  |
| H                                              | 2.587783  | -1.548344 | 2.450087  | C | 0.274448  | -0.688223 | 2.244652  |
| H                                              | -1.544442 | -2.881035 | 0.516197  | C | 0.513839  | 0.684570  | 1.989350  |
| H                                              | -2.723097 | -1.383268 | 2.108609  | H | -0.052312 | 1.452960  | 2.514923  |
| H                                              | -4.387192 | 0.848501  | -1.199421 | C | 1.344993  | 1.083413  | 0.902232  |
| H                                              | -3.204023 | -0.638008 | -2.789120 | H | 1.373534  | 2.143201  | 0.647368  |
| H                                              | -0.566714 | -2.986507 | -1.780037 | C | 2.744866  | 0.588941  | -1.153850 |
| H                                              | -1.417225 | -2.262506 | -3.160795 | H | 2.358278  | 1.589742  | -1.409287 |
| H                                              | -2.072935 | -3.741979 | -2.403382 | C | 4.216354  | 0.732049  | -0.762631 |
| H                                              | -4.401041 | 1.729943  | 1.000161  | H | 4.344863  | 1.423145  | 0.083907  |
| H                                              | -3.646673 | 0.076588  | 3.470675  | H | 4.806856  | 1.114565  | -1.609114 |
| H                                              | -4.075563 | 1.793313  | 3.408956  | H | 4.640670  | -0.242036 | -0.469803 |
| H                                              | -2.583653 | 1.235456  | 2.610407  | C | 2.566628  | -0.304916 | -2.376032 |
| H                                              | -5.906636 | -0.609163 | 2.325395  | H | 3.048622  | -1.286051 | -2.236428 |
| H                                              | -6.426357 | 0.251912  | 0.857858  | H | 3.040052  | 0.160676  | -3.253223 |
| H                                              | -6.369247 | 1.107450  | 2.417440  | H | 1.503065  | -0.473675 | -2.598974 |
|                                                |           |           |           | C | -0.715403 | -1.123843 | 3.277534  |
| <b>[Ru(OAc)<sub>2</sub>(<i>p</i>-cymene)]</b>  |           |           |           | H | -1.316700 | -1.965832 | 2.907200  |
| E(SMD/def2-QZVP*) = -940.928367 E <sub>h</sub> |           |           |           | H | -1.395654 | -0.302600 | 3.538442  |
| ΔΔG(353) = 0.254300 E <sub>h</sub>             |           |           |           | H | -0.192136 | -1.445779 | 4.192271  |
| Lowest frequency = 19.80 cm <sup>-1</sup>      |           |           |           | C | -1.793125 | -1.555271 | -1.199943 |

C -1.543438 2.359108 -0.138215  
 Ru -0.169599 -0.273890 0.189433  
 O -0.699321 -1.150383 -1.686672  
 O -1.958619 -1.426229 0.046955  
 O -1.434034 1.127062 -0.533233  
 O -0.879858 2.900389 0.732549  
 C -2.625426 3.106886 -0.890170  
 H -3.592036 2.602419 -0.744958  
 H -2.686081 4.143242 -0.537347  
 H -2.410705 3.086849 -1.968746  
 C -2.866062 -2.119944 -2.069395  
 H -3.483799 -2.831178 -1.507062  
 H -3.507634 -1.287688 -2.397780  
 H -2.432121 -2.593490 -2.958806

**Acetate**

E(SMD/def2-QZVP\*) = -228.467675 E<sub>h</sub>

$\Delta\Delta G(353) = 0.014592 E_h$

Lowest frequency = 40.43 cm<sup>-1</sup>

C 0.220014 0.001633 -0.000009  
 O 0.802620 -1.099484 -0.000016  
 O 0.692779 1.155456 -0.000035  
 C -1.346982 -0.054735 0.000046  
 H -1.737753 0.480214 0.883510  
 H -1.737817 0.480304 -0.883334

H -1.725813 -1.089684 0.000013

**Pyridyl indole**

E(SMD/def2-QZVP\*) = -610.478575 E<sub>h</sub>

$\Delta\Delta G(353) = 0.154933 E_h$

Lowest frequency = 56.61 cm<sup>-1</sup>

C 1.116100 -0.091876 0.012371  
 C 2.186608 0.835163 -0.106455  
 C 3.509840 0.375742 -0.057932  
 C 3.747838 -0.978842 0.126283  
 C 2.680891 -1.878725 0.281726  
 C 1.358517 -1.452177 0.232279  
 C 0.249841 1.981677 -0.178029  
 C 1.601870 2.141166 -0.228519  
 H 4.338883 1.080918 -0.153375  
 H 4.774280 -1.350352 0.166538  
 H 2.890060 -2.937108 0.453332  
 H 0.550751 -2.165992 0.389938  
 H -0.559897 2.704483 -0.224131  
 H 2.130227 3.085459 -0.339015  
 N -0.067497 0.636142 -0.052808  
 C -1.389186 0.173129 -0.028504  
 C -1.731098 -1.108442 -0.486307  
 N -2.294466 1.042187 0.410039  
 C -3.065099 -1.489573 -0.422054

|   |           |           |           |
|---|-----------|-----------|-----------|
| H | -0.979707 | -1.768399 | -0.916311 |
| C | -3.568702 | 0.670774  | 0.448794  |
| C | -4.013671 | -0.591983 | 0.065073  |
| H | -3.363486 | -2.481210 | -0.770769 |
| H | -4.279138 | 1.422572  | 0.810986  |
| H | -5.070723 | -0.854871 | 0.129829  |



## Cartesian Coordinates and Energies

(PW6B95-D3(BJ)/def2-QZVP\*+SMD(AcOH)/M06-D3/def2-SVP level of theory

|                                                 |   |           |           |           |
|-------------------------------------------------|---|-----------|-----------|-----------|
| Intermediate A                                  | N | -0.383033 | 0.558450  | 1.453862  |
| E(SMD/def2-QZVP*) = -1325.968745 E <sub>h</sub> | C | 2.844475  | -0.361818 | 0.448324  |
| $\Delta\Delta G(353) = 0.389382 E_h$            | C | 1.381064  | -1.974175 | 1.073172  |
| Lowest frequency = 24.16 cm <sup>-1</sup>       | C | 3.316735  | -1.604828 | -0.034748 |
| C 0.902682 0.359349 1.805232                    | C | 3.502071  | 0.843558  | 0.187843  |
| C -1.108515 1.462816 2.141668                   | C | 2.374604  | -2.607099 | 0.387968  |
| C -0.573185 2.235614 3.159156                   | C | 4.498398  | -1.633398 | -0.790989 |
| C 0.765833 2.057592 3.500197                    | C | 4.667881  | 0.782351  | -0.565555 |
| C 1.507027 1.100317 2.822941                    | H | 3.123827  | 1.800035  | 0.563914  |
| Ru -1.281489 -0.281513 -0.330966                | H | 2.442450  | -3.680797 | 0.217892  |
| C 0.242927 0.582488 -1.656670                   | C | 5.161529  | -0.442594 | -1.046887 |
| C 0.197937 -0.811612 -1.853116                  | H | 4.887737  | -2.581365 | -1.172562 |
| C -1.037459 -1.472607 -2.141422                 | H | 5.213272  | 1.704506  | -0.783408 |
| C -2.211388 -0.684721 -2.245051                 | H | 6.084268  | -0.452546 | -1.632752 |
| C -2.153308 0.717050 -2.008841                  | N | 1.645783  | -0.603488 | 1.117803  |
| C -0.932742 1.385577 -1.716480                  | O | -3.045454 | -0.290544 | 0.867659  |
| H 1.102276 -1.408120 -1.694092                  | C | -2.763629 | -1.425459 | 1.364343  |
| H -3.088777 1.285578 -1.952097                  | O | -1.720470 | -1.989659 | 0.921249  |
| H 2.548626 0.889069 3.076555                    | C | -3.589975 | -2.028778 | 2.438547  |
| H 1.222606 2.643303 4.301951                    | H | -3.496384 | -3.122269 | 2.431719  |
| H -1.203389 2.964088 3.672509                   | H | -3.226928 | -1.661236 | 3.411900  |
| H -2.157161 1.560332 1.845551                   | H | -4.639756 | -1.724689 | 2.334891  |

|                                                 |           |           |           |    |           |           |           |
|-------------------------------------------------|-----------|-----------|-----------|----|-----------|-----------|-----------|
| H                                               | 0.485076  | -2.366763 | 1.554421  | C  | -1.380864 | 3.363237  | -2.281947 |
| H                                               | 1.193267  | 1.025370  | -1.339945 | C  | -1.852829 | 2.056078  | -2.258335 |
| H                                               | -3.180593 | -1.173080 | -2.381005 | Ru | 1.030605  | -0.128723 | 0.220437  |
| C                                               | -1.088705 | -2.959176 | -2.208240 | C  | -0.392077 | -0.345103 | 1.902916  |
| H                                               | -0.851900 | -3.297623 | -3.230540 | C  | 0.280698  | -1.563591 | 1.687914  |
| H                                               | -0.348298 | -3.403448 | -1.525943 | C  | 1.706951  | -1.667277 | 1.658000  |
| H                                               | -2.084988 | -3.341115 | -1.943868 | C  | 2.441547  | -0.470857 | 1.818959  |
| C                                               | -0.936046 | 2.875328  | -1.469987 | C  | 1.783052  | 0.779633  | 1.984207  |
| H                                               | -1.838598 | 3.085978  | -0.861030 | C  | 0.354387  | 0.860690  | 2.036912  |
| C                                               | -1.082299 | 3.597159  | -2.808376 | H  | -0.311337 | -2.456392 | 1.463878  |
| H                                               | -1.992258 | 3.291293  | -3.348220 | H  | 2.372520  | 1.702927  | 2.011417  |
| H                                               | -1.129625 | 4.686778  | -2.659120 | H  | -2.777742 | 1.762183  | -2.759824 |
| H                                               | -0.217389 | 3.384474  | -3.459673 | H  | -1.957642 | 4.144869  | -2.782820 |
| C                                               | 0.283047  | 3.381589  | -0.717102 | H  | 0.270291  | 4.664369  | -1.731874 |
| H                                               | 0.170937  | 4.453468  | -0.495262 | H  | 1.541437  | 2.801762  | -0.630455 |
| H                                               | 0.439180  | 2.858865  | 0.241197  | N  | 0.075768  | 1.387010  | -1.002667 |
| H                                               | 1.202442  | 3.276233  | -1.318969 | C  | -2.551327 | -0.808666 | -0.932255 |
| Transition state <b>TS1</b>                     |           |           |           | C  | -0.449406 | -1.241675 | -1.654467 |
| E(SMD/def2-QZVP*) = -1325.948371 E <sub>h</sub> |           |           |           | C  | -2.270351 | -2.179561 | -0.695333 |
| $\Delta\Delta G(353) = 0.389554 E_h$            |           |           |           | C  | -3.733391 | -0.206614 | -0.494363 |
| Lowest frequency = -111.19 cm <sup>-1</sup>     |           |           |           | C  | -0.947396 | -2.428973 | -1.177522 |
| C                                               | -1.086594 | 1.090844  | -1.611057 | C  | -3.223276 | -2.972182 | -0.031332 |
| C                                               | 0.558484  | 2.634767  | -1.082391 | C  | -4.648831 | -1.013450 | 0.166946  |
| C                                               | -0.148045 | 3.656747  | -1.700204 | H  | -3.938507 | 0.854103  | -0.664466 |
|                                                 |           |           |           | H  | -0.415269 | -3.380510 | -1.204554 |

C -4.401009 -2.381563 0.392696  
 H -3.032287 -4.034078 0.147616  
 H -5.589067 -0.577204 0.514777  
 H -5.154173 -2.981471 0.909589  
 N -1.442357 -0.256314 -1.560890  
 O 2.619241 0.416627 -1.010148  
 C 3.042991 -0.638166 -1.629977  
 O 2.484226 -1.728119 -1.495747  
 C 4.253322 -0.444612 -2.491859  
 H 4.389399 -1.305263 -3.158290  
 H 4.176026 0.485353 -3.072308  
 H 5.142544 -0.349875 -1.849299  
 H 0.443647 -1.079559 -2.260371  
 H -1.485571 -0.326618 1.854126  
 H 3.526695 -0.489563 1.673640  
 C 2.373957 -2.969722 1.376379  
 H 2.526952 -3.527512 2.315195  
 H 1.761621 -3.588845 0.705155  
 H 3.349585 -2.822228 0.893684  
 C -0.291368 2.204060 2.260634  
 H 0.311918 2.943529 1.697142  
 C -0.174066 2.536075 3.749113  
 H 0.871266 2.536119 4.095397  
 H -0.598735 3.530495 3.955097  
 H -0.730293 1.801030 4.355208

C -1.734787 2.302448 1.798974  
 H -2.097660 3.334599 1.918483  
 H -1.862243 2.023823 0.740896  
 H -2.400251 1.659416 2.400111

**Intermediate B**

E(SMD/def2-QZVP\*) = -1325.951899 E<sub>h</sub>

$\Delta\Delta G(353) = 0.388463$  E<sub>h</sub>

Lowest frequency = 31.67 cm<sup>-1</sup>

C -1.185912 1.010742 -1.674563  
 C 0.117517 2.788510 -0.964760  
 C -0.706729 3.697718 -1.615176  
 C -1.818653 3.220236 -2.306653  
 C -2.054778 1.850042 -2.361228  
 Ru 0.916205 0.016344 0.232307  
 C -0.371457 -0.459745 1.971139  
 C 0.572987 -1.499483 1.775378  
 C 1.973351 -1.268492 1.714445  
 C 2.399461 0.084969 1.807109  
 C 1.477332 1.143935 1.985109  
 C 0.070391 0.881662 2.074024  
 H 0.207233 -2.519645 1.620123  
 H 1.835073 2.178818 2.005013  
 H -2.870016 1.423067 -2.949674  
 H -2.481804 3.911230 -2.833158

H -0.469939 4.762843 -1.586807  
 H 1.017562 3.105313 -0.428284  
 N -0.146634 1.477046 -0.957498  
 C -2.262291 -1.150949 -1.074099  
 C -0.058089 -1.098062 -1.611035  
 C -1.686573 -2.395194 -0.702807  
 C -3.584585 -0.829680 -0.758481  
 C -0.310155 -2.346547 -1.069476  
 C -2.472395 -3.357465 -0.041836  
 C -4.330856 -1.795065 -0.098210  
 H -4.020902 0.137095 -1.023755  
 H 0.438342 -3.137668 -1.002465  
 C -3.787616 -3.048241 0.252011  
 H -2.046730 -4.327016 0.232343  
 H -5.373662 -1.580652 0.151141  
 H -4.419611 -3.780254 0.760555  
 N -1.277472 -0.384259 -1.677426  
 O 2.406786 0.527787 -1.099852  
 C 3.145531 -0.429274 -1.591090  
 O 2.918086 -1.618617 -1.420264  
 C 4.321866 0.066079 -2.387187  
 H 4.762240 -0.755955 -2.965033  
 H 4.028224 0.891026 -3.051429  
 H 5.083185 0.464645 -1.698360  
 H 0.755123 -0.834038 -2.289011

H -1.439770 -0.697756 1.963714  
 H 3.454935 0.318841 1.632255  
 C 2.942781 -2.383880 1.520910  
 H 3.315595 -2.729919 2.499383  
 H 2.473442 -3.237104 1.011040  
 H 3.797208 -2.067934 0.907456  
 C -0.873903 2.036151 2.292146  
 H -0.441179 2.906685 1.760682  
 C -0.880401 2.355673 3.787659  
 H 0.129156 2.573469 4.170097  
 H -1.516134 3.230830 3.991791  
 H -1.282433 1.504999 4.363646  
 C -2.284705 1.813647 1.776363  
 H -2.880563 2.730208 1.903933  
 H -2.304987 1.547070 0.707157  
 H -2.805559 1.016086 2.333370

Transition state **TS2**

$E(\text{SMD/def2-QZVP}^*) = -1325.941160 E_h$

$\Delta\Delta G(353) = 0.385173 E_h$

Lowest frequency =  $-985.57 \text{ cm}^{-1}$

C 0.748172 -1.666426 0.855463  
 C -1.279880 -1.852430 1.981049  
 C -0.810677 -2.901750 2.752404  
 C 0.498384 -3.340850 2.545938

|    |           |           |           |   |           |           |           |
|----|-----------|-----------|-----------|---|-----------|-----------|-----------|
| C  | 1.287165  | -2.731102 | 1.582343  | C | 5.111465  | -0.718543 | -0.169314 |
| Ru | -1.171928 | 0.411726  | -0.100130 | H | 3.830956  | -1.697149 | 1.260236  |
| C  | -0.154914 | 2.255844  | 0.572043  | H | 1.219954  | 0.806970  | -2.923149 |
| C  | -0.709884 | 2.436281  | -0.732191 | C | 5.221075  | 0.032341  | -1.356228 |
| C  | -2.070994 | 2.187645  | -1.014567 | H | 4.172386  | 0.997656  | -2.978150 |
| C  | -2.956177 | 1.749246  | 0.018422  | H | 6.019610  | -0.981600 | 0.379807  |
| C  | -2.422925 | 1.550964  | 1.312959  | H | 6.210970  | 0.329078  | -1.711352 |
| C  | -1.038459 | 1.782115  | 1.572503  | N | 1.398598  | -0.997660 | -0.159298 |
| C  | 1.301817  | 2.559707  | 0.821280  | O | -2.499284 | -1.005884 | -0.887798 |
| H  | -0.037577 | 2.707217  | -1.553415 | C | -2.183671 | -1.956908 | -1.676948 |
| H  | -2.440305 | 2.272150  | -2.040344 | O | -1.029881 | -2.152023 | -2.106624 |
| H  | -3.066225 | 1.150457  | 2.102643  | H | -0.222893 | -1.102308 | -1.659320 |
| H  | -0.639842 | 1.523498  | 2.558986  | C | -3.292967 | -2.858342 | -2.124703 |
| H  | 1.847376  | 2.237231  | -0.087245 | H | -3.660607 | -2.499554 | -3.099066 |
| H  | 2.287722  | -3.098899 | 1.352129  | H | -2.913892 | -3.877789 | -2.273785 |
| H  | 0.896930  | -4.180484 | 3.121055  | H | -4.128773 | -2.847846 | -1.414108 |
| H  | -1.463000 | -3.373333 | 3.489053  | C | 1.893366  | 1.826750  | 2.013654  |
| H  | -2.305871 | -1.482667 | 2.074071  | H | 2.982625  | 1.983322  | 2.049074  |
| N  | -0.510920 | -1.231165 | 1.073852  | H | 1.486053  | 2.201473  | 2.968500  |
| C  | 2.742006  | -0.778303 | -0.399924 | H | 1.719571  | 0.738235  | 1.967656  |
| C  | 0.608567  | -0.329095 | -1.141644 | C | 1.472136  | 4.070263  | 0.967995  |
| C  | 2.832375  | 0.009027  | -1.580810 | H | 2.533588  | 4.330373  | 1.101036  |
| C  | 3.884175  | -1.133792 | 0.326444  | H | 1.099533  | 4.616406  | 0.086670  |
| C  | 1.503397  | 0.269148  | -2.016759 | H | 0.921691  | 4.440815  | 1.849732  |
| C  | 4.093577  | 0.402310  | -2.064540 | C | -4.368347 | 1.402205  | -0.297371 |

|                                                 |           |           |           |   |           |           |           |
|-------------------------------------------------|-----------|-----------|-----------|---|-----------|-----------|-----------|
| H                                               | -4.992328 | 2.310862  | -0.268802 | H | 0.083874  | 3.307139  | -0.447171 |
| H                                               | -4.449183 | 0.965366  | -1.302933 | H | 2.996063  | -1.532660 | 2.374594  |
| H                                               | -4.776776 | 0.681762  | 0.425252  | H | 1.819173  | -2.688677 | 4.221231  |
| Intermediate C                                  |           |           |           | H | -0.707015 | -2.698228 | 4.263957  |
| E(SMD/def2-QZVP*) = -1325.963398 E <sub>h</sub> |           |           |           | H | -1.918352 | -1.532790 | 2.414081  |
| $\Delta\Delta G(353) = 0.385144 E_h$            |           |           |           | N | -0.192900 | -0.888431 | 1.468276  |
| Lowest frequency = 11.67 cm <sup>-1</sup>       |           |           |           | C | 2.990434  | 0.117171  | -0.032167 |
| C                                               | 1.160627  | -0.871788 | 1.433279  | C | 0.760072  | 0.298867  | -0.606897 |
| C                                               | -0.825426 | -1.538405 | 2.458868  | C | 2.892124  | 0.781176  | -1.279051 |
| C                                               | -0.151850 | -2.188255 | 3.475349  | C | 4.229319  | -0.092123 | 0.575978  |
| C                                               | 1.244369  | -2.176818 | 3.445175  | C | 1.491498  | 0.878189  | -1.611298 |
| C                                               | 1.909683  | -1.524208 | 2.421747  | C | 4.048972  | 1.216834  | -1.932634 |
| Ru                                              | -1.197418 | -0.004669 | -0.163616 | C | 5.365990  | 0.352642  | -0.092937 |
| C                                               | -1.577869 | 2.117264  | 0.057611  | H | 4.344542  | -0.568131 | 1.549619  |
| C                                               | -1.806863 | 1.744529  | -1.305631 | H | 1.084446  | 1.348590  | -2.508314 |
| C                                               | -2.671928 | 0.684390  | -1.632953 | C | 5.281610  | 0.995100  | -1.334336 |
| C                                               | -3.455592 | 0.017198  | -0.626373 | H | 3.977333  | 1.727893  | -2.896754 |
| C                                               | -3.274363 | 0.402509  | 0.706768  | H | 6.344609  | 0.197851  | 0.368863  |
| C                                               | -2.296236 | 1.390484  | 1.045699  | H | 6.196150  | 1.329653  | -1.830668 |
| C                                               | -0.635675 | 3.246103  | 0.391426  | N | 1.675653  | -0.190812 | 0.358154  |
| H                                               | -1.218676 | 2.225463  | -2.094103 | O | -1.084052 | -2.036949 | -0.939049 |
| H                                               | -2.748677 | 0.351026  | -2.672719 | C | -0.319087 | -2.659369 | -1.679522 |
| H                                               | -3.818204 | -0.121384 | 1.498967  | O | 0.733846  | -2.141737 | -2.244301 |
| H                                               | -2.088968 | 1.587253  | 2.103157  | H | 0.850877  | -1.190664 | -1.988821 |
|                                                 |           |           |           | C | -0.538299 | -4.092792 | -2.004150 |

|                                                 |           |           |           |    |           |           |           |
|-------------------------------------------------|-----------|-----------|-----------|----|-----------|-----------|-----------|
| H                                               | -0.591362 | -4.218124 | -3.095917 | Ru | 1.062380  | -0.421968 | -0.441454 |
| H                                               | 0.330216  | -4.677046 | -1.664142 | C  | 0.842029  | -2.641139 | -0.001977 |
| H                                               | -1.452808 | -4.465207 | -1.530122 | C  | 1.592656  | -2.457226 | -1.187229 |
| C                                               | 0.158932  | 3.033477  | 1.668724  | C  | 2.798030  | -1.698916 | -1.179904 |
| H                                               | 0.865461  | 3.864603  | 1.813987  | C  | 3.239595  | -1.141425 | 0.055307  |
| H                                               | -0.488095 | 3.010892  | 2.562505  | C  | 2.431260  | -1.237394 | 1.189729  |
| H                                               | 0.745781  | 2.100917  | 1.637804  | C  | 1.202117  | -1.986596 | 1.192793  |
| C                                               | -1.435974 | 4.545577  | 0.438549  | H  | 1.249296  | -2.908727 | -2.123401 |
| H                                               | -0.771132 | 5.406937  | 0.605805  | H  | 2.732651  | -0.728638 | 2.112776  |
| H                                               | -1.989470 | 4.722591  | -0.497606 | H  | -2.821756 | 2.013079  | 1.847860  |
| H                                               | -2.169989 | 4.522512  | 1.262730  | H  | -1.449507 | 3.312022  | 3.446376  |
| C                                               | -4.347174 | -1.111833 | -1.013320 | H  | 1.071006  | 3.100504  | 3.371143  |
| H                                               | -5.246108 | -0.732066 | -1.526309 | H  | 2.072106  | 1.595297  | 1.652533  |
| H                                               | -3.832908 | -1.790279 | -1.711670 | N  | 0.243909  | 0.957678  | 0.904393  |
| H                                               | -4.671745 | -1.693950 | -0.139542 | C  | -3.089564 | 0.029777  | -0.283390 |
| <b>Intermediate D</b>                           |           |           |           | C  | -0.922807 | -0.490456 | -0.856682 |
| E(SMD/def2-QZVP*) = -1403.482404 E <sub>h</sub> |           |           |           | C  | -3.100712 | -0.885167 | -1.363765 |
| $\Delta\Delta G(353) = 0.423396 E_h$            |           |           |           | C  | -4.275224 | 0.499556  | 0.280286  |
| Lowest frequency = 24.43 cm <sup>-1</sup>       |           |           |           | C  | -1.730478 | -1.187484 | -1.701586 |
| C                                               | -1.108261 | 1.061839  | 0.929375  | C  | -4.319500 | -1.323769 | -1.888696 |
| C                                               | 0.987226  | 1.689251  | 1.757131  | C  | -5.476534 | 0.046068  | -0.258839 |
| C                                               | 0.429553  | 2.533502  | 2.694818  | H  | -4.305566 | 1.196470  | 1.117711  |
| C                                               | -0.965243 | 2.644845  | 2.728728  | H  | -1.402183 | -1.850006 | -2.504279 |
| C                                               | -1.738953 | 1.917656  | 1.845537  | C  | -5.501277 | -0.852377 | -1.331409 |
|                                                 |           |           |           | H  | -4.336975 | -2.027247 | -2.725799 |

|   |           |           |           |
|---|-----------|-----------|-----------|
| H | -6.416514 | 0.404034  | 0.168992  |
| H | -6.462106 | -1.185498 | -1.732336 |
| N | -1.734284 | 0.270293  | 0.015127  |
| C | 1.732245  | 1.349987  | -1.588462 |
| H | 2.829375  | 1.368739  | -1.569029 |
| C | 1.030330  | 0.498347  | -2.447503 |
| H | 1.560956  | -0.157639 | -3.143426 |
| H | 0.017339  | 0.781622  | -2.746837 |
| C | 1.085599  | 2.619205  | -1.154256 |
| O | -0.071341 | 2.904933  | -1.321959 |
| O | 1.969349  | 3.413548  | -0.540534 |
| H | -0.098369 | -3.196549 | -0.054414 |
| H | 4.170307  | -0.565553 | 0.087041  |
| C | 0.405790  | -2.092820 | 2.471108  |
| H | 0.427712  | -1.083746 | 2.932162  |
| C | 1.113342  | -3.062232 | 3.417091  |
| H | 2.154842  | -2.766633 | 3.621534  |
| H | 0.584557  | -3.115739 | 4.380942  |
| H | 1.130501  | -4.078298 | 2.987377  |
| C | -1.046022 | -2.492949 | 2.265962  |
| H | -1.573602 | -1.841127 | 1.550109  |
| H | -1.133313 | -3.533312 | 1.908865  |
| H | -1.586428 | -2.444602 | 3.223122  |
| C | 3.635896  | -1.565717 | -2.408111 |
| H | 4.030395  | -0.544821 | -2.529424 |

|   |          |           |           |
|---|----------|-----------|-----------|
| H | 4.505264 | -2.239445 | -2.332508 |
| H | 3.085599 | -1.844994 | -3.317809 |
| C | 1.480121 | 4.682122  | -0.124836 |
| H | 2.316756 | 5.199605  | 0.358159  |
| H | 1.122428 | 5.262612  | -0.988079 |
| H | 0.641810 | 4.562572  | 0.580610  |

Transition state **TS3**

E(SMD/def2-QZVP\*) = -1403.462204 E<sub>h</sub>

$\Delta\Delta G(353) = 0.423437 E_h$

Lowest frequency = -262.37 cm<sup>-1</sup>

|    |           |           |           |
|----|-----------|-----------|-----------|
| C  | -0.930400 | 1.481992  | 0.698631  |
| C  | 1.135607  | 1.594761  | 1.760407  |
| C  | 0.744914  | 2.675961  | 2.526150  |
| C  | -0.535506 | 3.195562  | 2.325187  |
| C  | -1.379801 | 2.605392  | 1.401226  |
| Ru | 0.873907  | -0.629788 | -0.351212 |
| C  | 0.112972  | -2.685190 | 0.145198  |
| C  | 0.832396  | -2.697464 | -1.083635 |
| C  | 2.173741  | -2.244203 | -1.163439 |
| C  | 2.783818  | -1.750679 | 0.033191  |
| C  | 2.040101  | -1.668163 | 1.220762  |
| C  | 0.683314  | -2.139317 | 1.307845  |
| H  | 0.335559  | -3.047949 | -1.994613 |
| H  | 2.492187  | -1.205325 | 2.105421  |



|   |           |           |           |   |           |           |           |
|---|-----------|-----------|-----------|---|-----------|-----------|-----------|
| H | -2.360359 | 3.027136  | 1.184825  | O | 1.374384  | 3.057256  | -0.903589 |
| H | -0.868783 | 4.077290  | 2.878093  | O | 3.404635  | 2.112787  | -0.736385 |
| H | 1.438670  | 3.118336  | 3.242866  | H | -0.938457 | -2.986010 | 0.143369  |
| H | 2.148030  | 1.184416  | 1.832098  | H | 3.800404  | -1.345840 | -0.004557 |
| N | 0.319344  | 0.999290  | 0.873778  | C | -0.064909 | -2.013184 | 2.611114  |
| C | -3.057183 | 0.677854  | -0.411504 | H | 0.278486  | -1.065293 | 3.072376  |
| C | -1.013029 | -0.113084 | -1.096282 | C | 0.338809  | -3.162371 | 3.532516  |
| C | -3.257070 | -0.283414 | -1.434693 | H | 1.427793  | -3.200693 | 3.696102  |
| C | -4.132609 | 1.264545  | 0.255813  | H | -0.146351 | -3.061775 | 4.515521  |
| C | -1.967894 | -0.752849 | -1.848114 | H | 0.029799  | -4.130093 | 3.102021  |
| C | -4.560193 | -0.617639 | -1.827289 | C | -1.573874 | -1.939025 | 2.444008  |
| C | -5.415594 | 0.908389  | -0.148643 | H | -1.881688 | -1.157566 | 1.727851  |
| H | -4.004288 | 1.968764  | 1.078756  | H | -1.993527 | -2.899212 | 2.098872  |
| H | -1.769032 | -1.462899 | -2.652692 | H | -2.051889 | -1.716751 | 3.409808  |
| C | -5.629535 | -0.012862 | -1.184170 | C | 2.922350  | -2.293638 | -2.454194 |
| H | -4.725322 | -1.350962 | -2.621373 | H | 3.759038  | -1.579568 | -2.471499 |
| H | -6.273660 | 1.358911  | 0.356946  | H | 3.348812  | -3.298826 | -2.605151 |
| H | -6.652298 | -0.262168 | -1.478065 | H | 2.262076  | -2.085948 | -3.311124 |
| N | -1.671824 | 0.793542  | -0.232363 | C | 3.912274  | 3.325436  | -0.197709 |
| C | 1.723449  | 0.828308  | -1.697477 | H | 4.975990  | 3.159096  | 0.006779  |
| H | 2.546590  | 0.312526  | -2.203369 | H | 3.789390  | 4.152163  | -0.913161 |
| C | 0.397819  | 0.696496  | -2.215595 | H | 3.383295  | 3.595228  | 0.730131  |
| H | 0.258863  | 0.077209  | -3.108077 |   |           |           |           |
| H | -0.195812 | 1.620402  | -2.214566 |   |           |           |           |
| C | 2.110998  | 2.119367  | -1.086035 |   |           |           |           |

Intermediate **E**

E(SMD/def2-QZVP\*) = -1403.486541 E<sub>h</sub>

$$\Delta\Delta G(353) = 0.426426 E_h$$

Lowest frequency = 28.13 cm<sup>-1</sup>

C -0.648696 2.112464 -0.583715

C 1.005826 2.184309 1.025346

C 0.763189 3.529320 1.267285

C -0.228808 4.175303 0.536702

C -0.936001 3.459256 -0.424820

Ru 0.452831 -0.681574 -0.141373

C -0.927707 -1.813767 1.286699

C -0.419074 -2.655978 0.259339

C 0.969151 -2.823145 0.009089

C 1.861935 -2.044169 0.801973

C 1.367378 -1.157347 1.783605

C -0.040658 -1.034478 2.049335

H -1.131428 -3.187811 -0.381320

H 2.074440 -0.534394 2.343396

H -1.683193 3.926149 -1.070086

H -0.430732 5.238113 0.690854

H 1.366653 4.062562 2.003699

H 1.810255 1.657811 1.546501

N 0.287453 1.469814 0.148841

C -2.536976 0.690625 -1.196246

C -0.464319 0.280778 -2.049079

C -2.492546 -0.668411 -1.566018

C -3.644631 1.247177 -0.567638

C -1.158895 -0.918623 -2.070876

C -3.610405 -1.482797 -1.361754

C -4.740955 0.415407 -0.351987

H -3.662255 2.296740 -0.260888

H -0.823764 -1.812311 -2.602293

C -4.730666 -0.928603 -0.752788

H -3.602772 -2.532720 -1.670620

H -5.634222 0.824493 0.127400

H -5.617956 -1.544435 -0.585726

N -1.299040 1.285658 -1.516930

C 1.858107 -0.154199 -1.683500

H 2.259531 -1.097154 -2.085258

C 0.900036 0.567936 -2.612316

H 0.961477 0.230075 -3.660057

H 1.095464 1.651578 -2.608037

C 2.936929 0.671929 -1.104332

O 2.954956 1.880940 -1.052259

O 3.918222 -0.084283 -0.571320

H -2.010092 -1.712312 1.410167

H 2.933698 -2.059748 0.581628

C -0.514758 -0.100755 3.133754

H 0.262320 0.680790 3.244364

C -0.575009 -0.884931 4.444529

H 0.389029 -1.361222 4.684100

H -0.843290 -0.221805 5.281317

|                                                 |           |           |           |   |           |           |           |
|-------------------------------------------------|-----------|-----------|-----------|---|-----------|-----------|-----------|
| H                                               | -1.337440 | -1.680148 | 4.385279  | C | 0.297159  | 1.981695  | -1.230913 |
| C                                               | -1.836280 | 0.587703  | 2.834648  | C | 0.421010  | 0.970137  | -2.224252 |
| H                                               | -1.808022 | 1.150182  | 1.886219  | C | -0.794091 | 0.367045  | -2.680197 |
| H                                               | -2.673507 | -0.128600 | 2.775535  | C | -2.034485 | 0.767588  | -2.149575 |
| H                                               | -2.082760 | 1.296244  | 3.640193  | C | -2.148392 | 1.867836  | -1.227500 |
| C                                               | 1.472195  | -3.746386 | -1.050492 | H | 1.215363  | 2.389727  | -0.791613 |
| H                                               | 2.432707  | -3.400188 | -1.461672 | H | -2.932370 | 0.199939  | -2.418455 |
| H                                               | 1.637367  | -4.755506 | -0.638589 | H | 3.259520  | 0.492076  | 3.014779  |
| H                                               | 0.752357  | -3.844489 | -1.877817 | H | 1.862940  | 1.587704  | 4.789583  |
| C                                               | 4.990856  | 0.622526  | 0.029909  | H | -0.603852 | 1.928802  | 4.322659  |
| H                                               | 5.722961  | -0.126842 | 0.353367  | H | -1.509320 | 1.173549  | 2.145089  |
| H                                               | 5.455455  | 1.318863  | -0.683884 | N | 0.293486  | 0.453610  | 1.414432  |
| H                                               | 4.643553  | 1.206932  | 0.897971  | C | 3.677923  | 0.149423  | 0.310954  |
|                                                 |           |           |           | C | 2.245055  | -1.612584 | 0.181136  |
| Intermediate F                                  |           |           |           | C | 4.299520  | -0.876394 | -0.435299 |
| E(SMD/def2-QZVP*) = -1632.962863 E <sub>h</sub> |           |           |           | C | 4.279030  | 1.392542  | 0.515921  |
| $\Delta\Delta G(353) = 0.480600 E_h$            |           |           |           | C | 3.375570  | -1.975544 | -0.488502 |
| Lowest frequency = 26.52 cm <sup>-1</sup>       |           |           |           | C | 5.568551  | -0.646184 | -0.982924 |
| C                                               | 1.608013  | 0.283791  | 1.654366  | C | 5.538392  | 1.593546  | -0.037791 |
| C                                               | -0.451367 | 1.029455  | 2.380724  | H | 3.782606  | 2.187745  | 1.081265  |
| C                                               | 0.057541  | 1.459691  | 3.591875  | H | 3.523303  | -2.933206 | -0.987805 |
| C                                               | 1.417995  | 1.279526  | 3.840184  | C | 6.176669  | 0.584343  | -0.776680 |
| C                                               | 2.194673  | 0.682938  | 2.863285  | H | 6.067092  | -1.423506 | -1.568521 |
| Ru                                              | -0.717904 | 0.234704  | -0.520904 | H | 6.037427  | 2.556021  | 0.102922  |
| C                                               | -0.966865 | 2.484190  | -0.793608 | H | 7.166563  | 0.776146  | -1.198958 |



|   |           |           |           |   |           |           |           |
|---|-----------|-----------|-----------|---|-----------|-----------|-----------|
| C | -0.374865 | -0.768662 | -2.256406 | C | 0.179482  | 1.984003  | -0.370359 |
| C | 0.935170  | -0.272779 | -2.562321 | C | -1.008329 | 2.517051  | 0.438604  |
| C | 2.090831  | -0.891677 | -2.058732 | H | -1.255207 | 3.540309  | 0.115143  |
| C | 1.999202  | -2.044299 | -1.211347 | H | -0.746282 | 2.596396  | 1.510813  |
| H | -1.453194 | -2.182614 | -1.024977 | H | 0.600404  | -3.303369 | -0.122103 |
| H | 3.067908  | -0.430573 | -2.236441 | H | 1.041448  | 0.653667  | -3.136504 |
| H | -3.179403 | -0.129392 | 3.057569  | C | 3.270477  | -2.658355 | -0.690892 |
| H | -1.913390 | -1.203146 | 4.951572  | H | 3.929729  | -1.809646 | -0.429207 |
| H | 0.499371  | -1.849464 | 4.549426  | C | 3.917656  | -3.447643 | -1.829540 |
| H | 1.506226  | -1.363829 | 2.330780  | H | 4.105406  | -2.822598 | -2.716752 |
| N | -0.220454 | -0.559544 | 1.514373  | H | 4.882343  | -3.866103 | -1.504225 |
| C | -3.453103 | -0.232737 | 0.225495  | H | 3.273695  | -4.288298 | -2.139090 |
| C | -2.204932 | 1.666540  | 0.220164  | C | 3.092511  | -3.525079 | 0.541301  |
| C | -4.138256 | 0.743589  | -0.531439 | H | 2.602587  | -2.983081 | 1.366015  |
| C | -3.935450 | -1.532600 | 0.387761  | H | 2.503786  | -4.432946 | 0.324158  |
| C | -3.328479 | 1.929610  | -0.508535 | H | 4.073072  | -3.863852 | 0.907920  |
| C | -5.346107 | 0.394455  | -1.152174 | C | -1.591351 | -0.145018 | -2.850689 |
| C | -5.135638 | -1.850479 | -0.238254 | H | -1.495282 | 0.947365  | -2.951707 |
| H | -3.394137 | -2.276449 | 0.982535  | H | -1.739059 | -0.548322 | -3.866430 |
| H | -3.542211 | 2.880520  | -0.996758 | H | -2.498597 | -0.366938 | -2.268209 |
| C | -5.831355 | -0.897214 | -1.000383 | O | 2.550408  | -0.006480 | 0.757055  |
| H | -5.894178 | 1.128683  | -1.749129 | C | 2.648394  | 1.002134  | 1.522695  |
| H | -5.544536 | -2.859062 | -0.134279 | O | 1.694964  | 1.798096  | 1.689091  |
| H | -6.771965 | -1.180802 | -1.479764 | H | 0.910586  | 1.549017  | 0.646202  |
| N | -2.255444 | 0.332616  | 0.668232  | C | 3.950768  | 1.244910  | 2.207129  |

|                                                 |           |           |           |   |           |           |           |
|-------------------------------------------------|-----------|-----------|-----------|---|-----------|-----------|-----------|
| H                                               | 4.512807  | 0.312345  | 2.341587  | C | 0.854924  | -1.005287 | -2.412288 |
| H                                               | 4.547152  | 1.912404  | 1.564090  | C | 2.063720  | -1.455711 | -1.853445 |
| H                                               | 3.793035  | 1.756910  | 3.164942  | C | 2.051291  | -2.362031 | -0.752059 |
| C                                               | 1.258364  | 2.944719  | -0.780117 | H | -1.402222 | -2.720776 | -0.492205 |
| O                                               | 2.202469  | 2.613674  | -1.458541 | H | 3.007180  | -0.989745 | -2.155389 |
| O                                               | 1.085363  | 4.165123  | -0.289274 | H | -2.804033 | 1.482950  | 2.790397  |
| C                                               | 2.117330  | 5.107067  | -0.552767 | H | -1.517273 | 1.172587  | 4.943986  |
| H                                               | 3.069536  | 4.760865  | -0.122579 | H | 0.620343  | -0.168791 | 4.863767  |
| H                                               | 2.253140  | 5.247170  | -1.635174 | H | 1.420367  | -1.006914 | 2.663257  |
| H                                               | 1.810161  | 6.047829  | -0.082729 | N | -0.199238 | -0.272284 | 1.597402  |
| H                                               | -0.202997 | 1.582879  | -1.316873 | C | -3.232008 | -0.308065 | 0.270749  |
|                                                 |           |           |           | C | -2.345490 | 1.715094  | -0.260318 |
| Intermediate G                                  |           |           |           | C | -4.115521 | 0.337581  | -0.621363 |
| E(SMD/def2-QZVP*) = -1632.965014 E <sub>h</sub> |           |           |           | C | -3.498823 | -1.561678 | 0.821096  |
| ΔΔG(353) = 0.479009 E <sub>h</sub>              |           |           |           | C | -3.527609 | 1.611108  | -0.935488 |
| Lowest frequency = 27.00 cm <sup>-1</sup>       |           |           |           | C | -5.283807 | -0.329192 | -1.015840 |
| C                                               | -1.358773 | 0.404525  | 1.639119  | C | -4.666498 | -2.199808 | 0.414562  |
| C                                               | 0.472337  | -0.468308 | 2.743913  | H | -2.820039 | -2.024503 | 1.546402  |
| C                                               | 0.032102  | 0.019061  | 3.963759  | H | -3.925247 | 2.366546  | -1.613687 |
| C                                               | -1.147636 | 0.755852  | 4.003858  | C | -5.542542 | -1.592968 | -0.501008 |
| C                                               | -1.856318 | 0.938415  | 2.824151  | H | -5.982157 | 0.140936  | -1.713781 |
| Ru                                              | 0.803465  | -0.679445 | -0.266550 | H | -4.910674 | -3.185377 | 0.820159  |
| C                                               | 0.776972  | -2.794468 | -0.265071 | H | -6.451139 | -2.122094 | -0.800166 |
| C                                               | -0.437326 | -2.408794 | -0.905684 | N | -2.121466 | 0.520115  | 0.456468  |
| C                                               | -0.418903 | -1.512133 | -1.988078 | C | -0.228699 | 2.300670  | -1.360468 |

|   |           |           |           |                                                 |           |           |           |
|---|-----------|-----------|-----------|-------------------------------------------------|-----------|-----------|-----------|
| C | -1.280785 | 2.750006  | -0.354205 | H                                               | 3.540430  | 2.860561  | 2.092702  |
| H | -1.724273 | 3.706478  | -0.670301 | H                                               | 4.328503  | 1.243221  | 1.899782  |
| H | -0.793734 | 2.922570  | 0.619237  | C                                               | 1.085681  | 3.029518  | -1.393602 |
| H | 0.729182  | -3.404622 | 0.642086  | O                                               | 2.115167  | 2.520485  | -1.765877 |
| H | 0.882637  | -0.197704 | -3.152612 | O                                               | 0.961427  | 4.293149  | -1.014492 |
| C | 3.357278  | -2.749477 | -0.114510 | C                                               | 2.154370  | 5.061401  | -0.954692 |
| H | 3.970775  | -1.829090 | -0.105942 | H                                               | 2.818309  | 4.667132  | -0.169667 |
| C | 4.032711  | -3.785246 | -1.014592 | H                                               | 2.687919  | 5.036109  | -1.916022 |
| H | 4.185442  | -3.411446 | -2.039247 | H                                               | 1.856622  | 6.086987  | -0.709858 |
| H | 5.017809  | -4.058013 | -0.606450 | H                                               | -0.646355 | 2.311120  | -2.386078 |
| H | 3.428580  | -4.706381 | -1.076777 |                                                 |           |           |           |
| C | 3.235804  | -3.256838 | 1.310035  | Intermediate <b>H</b>                           |           |           |           |
| H | 2.726571  | -2.533539 | 1.966637  | E(SMD/def2-QZVP*) = -1632.988615 E <sub>h</sub> |           |           |           |
| H | 2.698402  | -4.219270 | 1.362243  | $\Delta\Delta G(353) = 0.478226 E_h$            |           |           |           |
| H | 4.236785  | -3.429762 | 1.732329  | Lowest frequency = 23.25 cm <sup>-1</sup>       |           |           |           |
| C | -1.669960 | -1.051945 | -2.653311 | C                                               | -0.308437 | 0.877812  | 1.860823  |
| H | -1.692094 | 0.042592  | -2.773671 | C                                               | -0.614725 | -1.328533 | 2.488132  |
| H | -1.723484 | -1.491782 | -3.663027 | C                                               | -0.788116 | -0.977479 | 3.819242  |
| H | -2.568193 | -1.359239 | -2.099324 | C                                               | -0.733815 | 0.366674  | 4.171261  |
| O | 2.412023  | 0.188909  | 0.607590  | C                                               | -0.479326 | 1.302871  | 3.176690  |
| C | 2.344853  | 1.417050  | 1.051967  | Ru                                              | -0.534243 | -1.182521 | -0.537079 |
| O | 1.304869  | 2.056916  | 1.110672  | C                                               | -2.401380 | -0.093225 | -0.944055 |
| H | 0.034780  | 1.234646  | -1.182046 | C                                               | -1.410284 | 0.341014  | -1.851092 |
| C | 3.674019  | 1.992391  | 1.434182  | C                                               | -0.676581 | -0.601793 | -2.629267 |
| H | 4.162663  | 2.325347  | 0.503006  | C                                               | -0.990289 | -1.981971 | -2.490318 |

|   |           |           |           |   |           |           |           |
|---|-----------|-----------|-----------|---|-----------|-----------|-----------|
| C | -1.966520 | -2.397684 | -1.546734 | H | 2.749103  | 1.857898  | 1.662095  |
| C | -2.700858 | -1.467368 | -0.753870 | H | 2.181043  | 0.321673  | 1.032122  |
| H | -1.147133 | 1.403145  | -1.892583 | H | -2.856884 | 0.659036  | -0.293298 |
| H | -2.085129 | -3.468494 | -1.343637 | H | -0.388081 | -2.729357 | -3.015120 |
| H | -0.394502 | 2.370975  | 3.391542  | C | -3.714374 | -1.965504 | 0.247776  |
| H | -0.869187 | 0.682419  | 5.208723  | H | -3.256860 | -2.849797 | 0.736582  |
| H | -0.965781 | -1.757515 | 4.561895  | C | -4.966715 | -2.424764 | -0.496129 |
| H | -0.644343 | -2.375599 | 2.173190  | H | -4.744084 | -3.203722 | -1.242363 |
| N | -0.403166 | -0.423278 | 1.513790  | H | -5.708480 | -2.834725 | 0.206373  |
| C | -0.976428 | 2.719233  | 0.348288  | H | -5.435991 | -1.577444 | -1.024570 |
| C | 1.190516  | 2.038677  | 0.232801  | C | -4.066691 | -0.948316 | 1.321128  |
| C | -0.332273 | 3.462284  | -0.669106 | H | -3.179907 | -0.567693 | 1.856286  |
| C | -2.322579 | 2.895583  | 0.673669  | H | -4.606445 | -0.084009 | 0.896314  |
| C | 1.031977  | 3.013806  | -0.715222 | H | -4.734562 | -1.402566 | 2.068344  |
| C | -1.082002 | 4.401979  | -1.393096 | C | 0.468063  | -0.149033 | -3.466780 |
| C | -3.038885 | 3.833060  | -0.062047 | H | 1.229277  | -0.935978 | -3.565719 |
| H | -2.796233 | 2.327064  | 1.482222  | H | 0.114383  | 0.118101  | -4.476297 |
| H | 1.826209  | 3.413877  | -1.345417 | H | 0.937068  | 0.743486  | -3.024438 |
| C | -2.425127 | 4.573388  | -1.087211 | O | 0.488359  | -2.855052 | 0.296150  |
| H | -0.612619 | 4.992086  | -2.185287 | C | 1.628577  | -2.359801 | 0.026924  |
| H | -4.093735 | 4.005015  | 0.168518  | O | 1.622045  | -1.248558 | -0.583863 |
| H | -3.016642 | 5.304881  | -1.643991 | H | 3.175393  | 0.946017  | -1.246182 |
| N | -0.041985 | 1.827698  | 0.864183  | C | 2.886805  | -3.024733 | 0.431077  |
| C | 3.540087  | 1.319071  | -0.271126 | H | 3.356503  | -2.428433 | 1.229600  |
| C | 2.410576  | 1.355949  | 0.733824  | H | 2.699048  | -4.048945 | 0.775212  |



|   |          |           |           |
|---|----------|-----------|-----------|
| H | 3.597973 | -3.019363 | -0.407740 |
| C | 4.640141 | 0.389540  | 0.157142  |
| O | 4.551547 | -0.427469 | 1.040363  |
| O | 5.731212 | 0.561016  | -0.584191 |
| C | 6.833513 | -0.288232 | -0.300871 |
| H | 7.158205 | -0.173040 | 0.744085  |
| H | 6.568013 | -1.343787 | -0.466901 |
| H | 7.640266 | 0.006637  | -0.981338 |
| H | 3.972479 | 2.313614  | -0.471349 |

**Alkene 3a**

E(SMD/def2-QZVP\*) = -306.978933 E<sub>h</sub>

$\Delta\Delta G(353) = 0.057218 E_h$

Lowest frequency = 98.10 cm<sup>-1</sup>

|   |           |           |           |
|---|-----------|-----------|-----------|
| C | -0.041115 | 0.115962  | -0.000001 |
| O | 0.056877  | 1.316312  | 0.000005  |
| O | 1.014428  | -0.712454 | 0.000034  |
| C | 2.285179  | -0.092297 | 0.000079  |
| H | 3.031048  | -0.896465 | 0.000102  |
| H | 2.415626  | 0.542922  | -0.890398 |

|   |           |           |           |
|---|-----------|-----------|-----------|
| H | 2.415565  | 0.542917  | 0.890568  |
| C | -1.309380 | -0.648391 | -0.000046 |
| C | -2.479582 | -0.011171 | -0.000087 |
| H | -1.230126 | -1.740092 | -0.000044 |
| H | -3.431146 | -0.548690 | -0.000120 |
| H | -2.502018 | 1.083925  | -0.000087 |

**HOAc**

E(SMD/def2-QZVP\*) = -229.469374 E<sub>h</sub>

$\Delta\Delta G(353) = 0.028749 E_h$

Lowest frequency = 91.72 cm<sup>-1</sup>

|   |           |           |           |
|---|-----------|-----------|-----------|
| C | -0.092892 | 0.124244  | -0.000006 |
| O | -0.646051 | 1.190449  | -0.000050 |
| O | -0.766277 | -1.039274 | -0.000003 |
| H | -1.709529 | -0.809639 | -0.000040 |
| C | 1.384835  | -0.103073 | 0.000051  |
| H | 1.672718  | -0.692564 | 0.883434  |
| H | 1.672778  | -0.692617 | -0.883278 |
| H | 1.911001  | 0.858393  | 0.000041  |
